# Supplementary material
Source: PubMed Central journal article supplement (PMC10112129)
Supplement: aac.01619-22-s0001.pdf [file aac.01619-22-s0001.pdf]

**a**

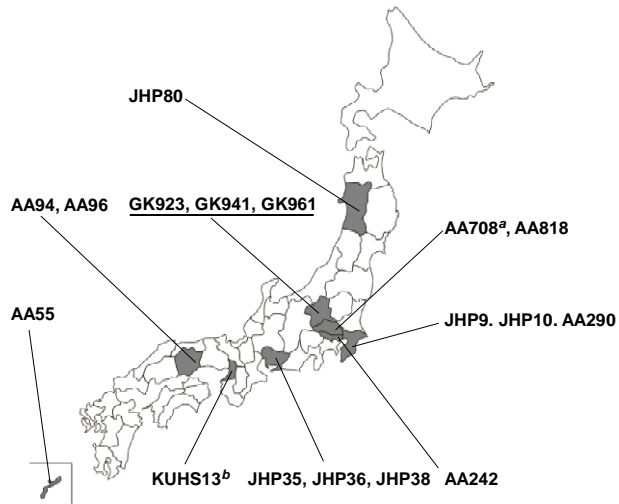

**b**

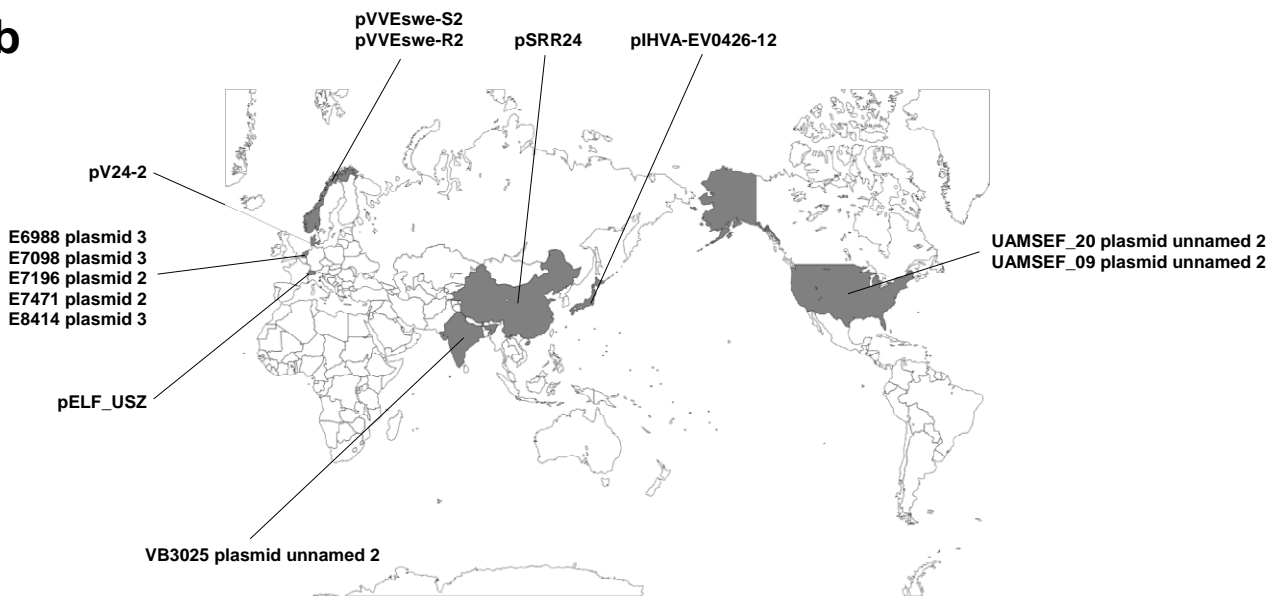

**Supplementary Figure 1. Geographic areas of detection of enterococci harboring pELF1-like plasmids.**

(a) Prefectures where enterococci harboring pELF1-like plasmids were isolated in Japan, are shown in black. <sup>a,b</sup> AA708 and KUHS13 were strains previously reported. Underlined strains indicate VSE strains. (b) The Countries where presumed pELF1-type plasmid harboring strains are detected are shown in black.



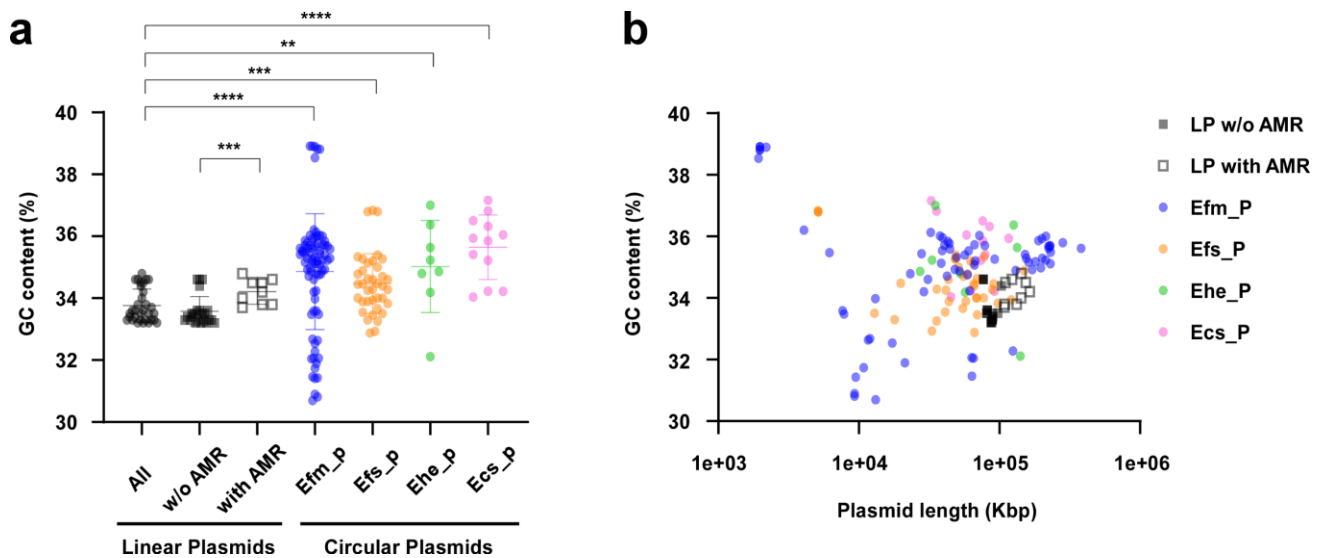

**Supplementary Figure 3. Scatter plot of GC content and plasmid size of enterococcal circular plasmids along with 32 pELF1-like plasmids.**

The GC content of 138 circular plasmids and 32 pELF1-like plasmids was analyzed. (a) The GC content of the plasmids possessed by each species and (b) the size and GC content of the plasmids are shown in the scatter plots. Black dots indicate all linear plasmids, Black squares indicate pELF1-like plasmids without AMR regions, white squares indicate linear plasmids with AMR regions, blue dots indicate circular plasmids of *E. faecium*, orange dots indicate circular plasmids of *E. faecalis*, green dots indicate circular plasmids of *E. hirae*, and pink dots indicate circular plasmids of *E. casseliflavus*. All circular plasmids were checked for possession of *rep* genes using PlasmidFinder (2.1). \*\*\*\*,  $p < 0.0001$ ; \*\*\*,  $p < 0.001$ ; \*\*,  $p < 0.01$  (Mann–Whitney test). LP stands for pELF1-like linear plasmids, Efm\_p for circular plasmids possessed by *E. faecium*, Efs\_p for circular plasmids possessed by *E. faecalis*, Ehe\_p for circular plasmids possessed by *E. hirae*, and Ecs\_p for circular plasmids possessed by *E. casseliflavus*.



**Supplementary Figure 4. Comparison of AMR regions containing vancomycin resistance genes in pELF1-like plasmids.**

The nine AMR regions containing vancomycin resistance genes on the pELF1-like plasmid were compared. The numbers assigned to each AMR region are consistent with those in Figure 2. The panels show the genetic structures. The green panels represent mobile genetic element-related genes, and the orange panels represent AMR genes. The arrows pointing vertically to the panels indicate the position of *IS1216E*.

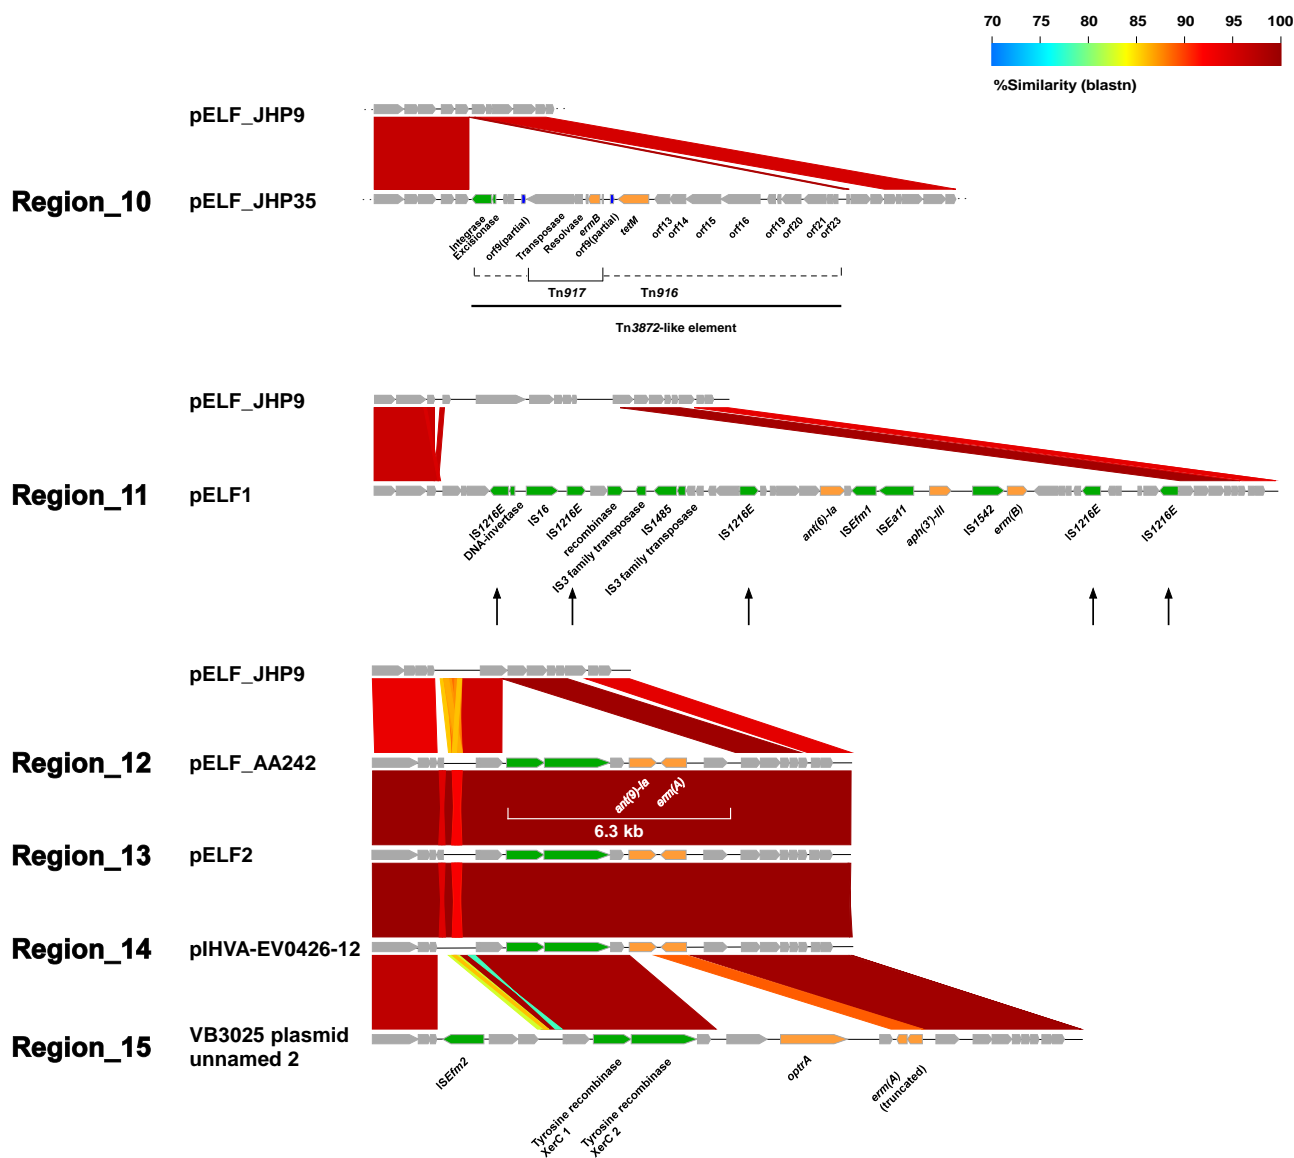

**Supplementary Figure 5. Comparison of AMR regions without vancomycin resistance genes in pELF1-like plasmids.**

The six AMR regions without vancomycin resistance genes on the pELF1-like plasmid were compared. The numbers assigned to each AMR region are consistent with those in Figure 2. The panel shows the genetic structure. The green panels represent mobile genetic element-related genes, and the orange panels represent AMR genes. The arrows pointing vertically to the panels indicate the position of *IS1216E*.

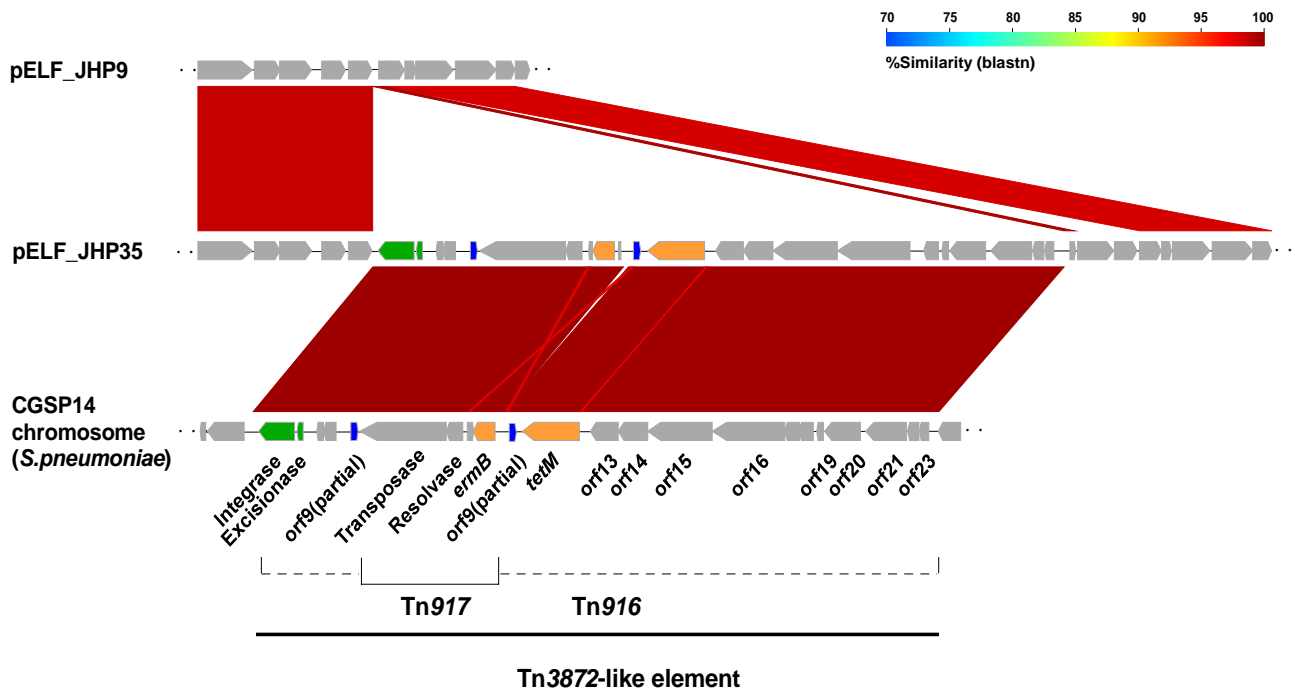

**Supplementary Figure 6. Comparative analysis of Tn3872-like element in pELF\_JHP35.**

The structures of the *Tn3872*-like element of pELF\_JHP35 and (B) the regions around *ant(9)-Ia* and *erm(A)* of pELF\_AA242 were compared with those of pELF\_JHP9. The blue panels represent partial *orf9* disrupted by Tn917, the orange panels represent AMR genes, and the green panels represent mobile genetic element-related genes.

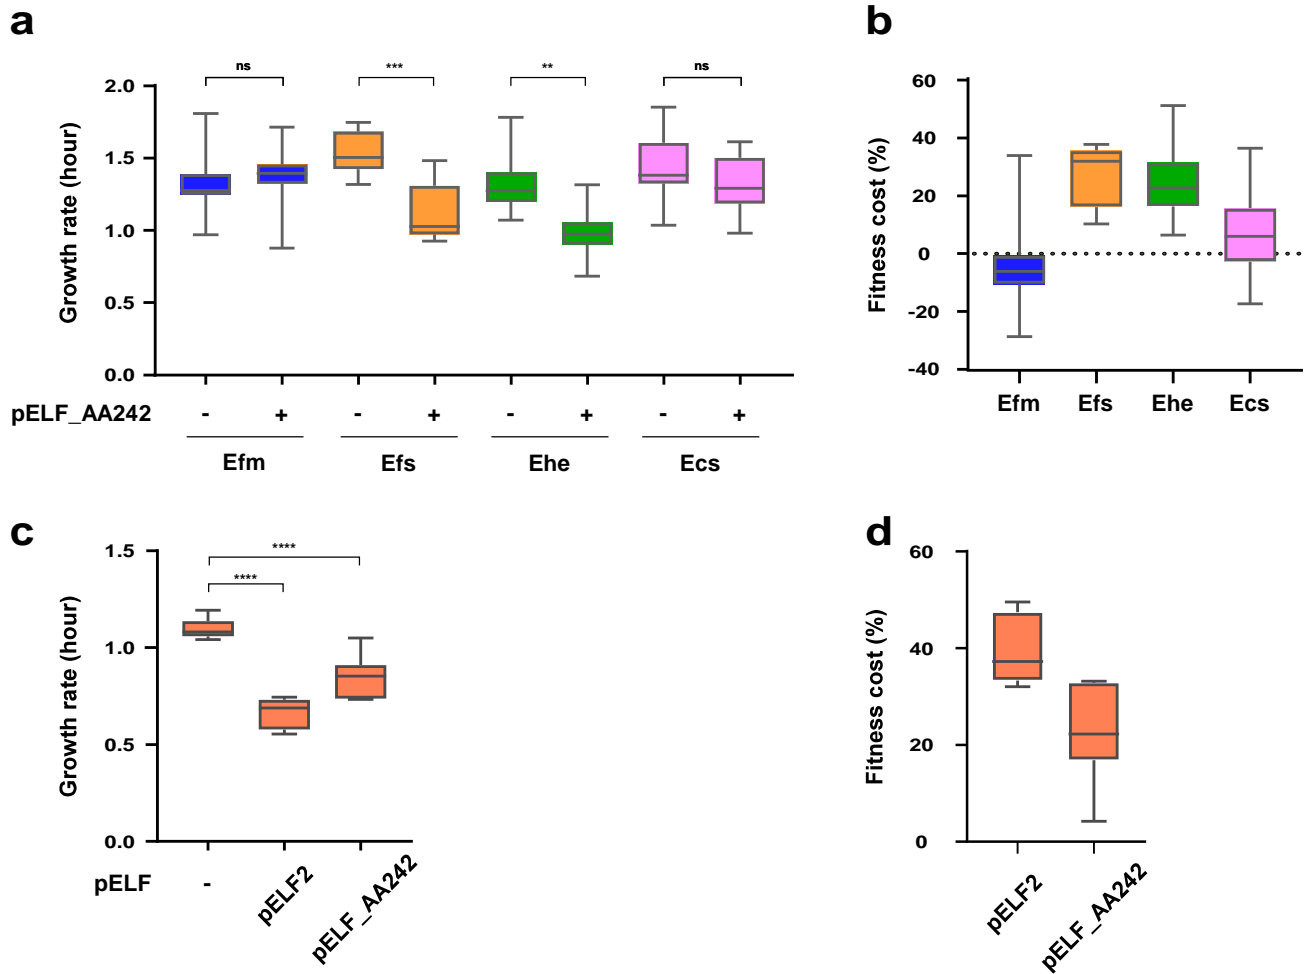

**Supplementary Figure 7. Additional analysis of the effect of pELF1-like plasmids on the growth of enterococci.**

The effects of possession of pELF1-like plasmid (pELF\_AA242) on (a) the growth rate and (b) the fitness cost of four *Enterococcus* species are shown. Efm: *E. faecium* (BM4105RF), Efs: *E. faecalis* (FA2-2), Ehe: *E. hirae* (ATCC9790RF), Ecs: *E. casseliflavus* (KT06RF). The box-and-whiskers indicate the minimum to maximum values. The unpaired *t*-test was used to analyze the pELF1-like plasmid harboring and non- harboring strains in the growth rate ((a)  $p = 0.6564$ ,  $p = 0.0002$ ,  $p = 0.0016$ , and  $p = 0.2744$ , respectively, and (c)  $p < 0.0001$ , and  $p < 0.0001$ ). The *E. faecalis* strain was changed to



OG1RF, and (c) the growth rates and (d) the fitness costs of pELF2 and pELF\_AA242 were analyzed.

For this analysis of growth rate and fitness cost, at least six biological replicates were subject to the

analyses in duplicate. \*\*,  $p \leq 0.01$ ; \*\*\*,  $p \leq 0.001$ ; \*\*\*\*,  $p \leq 0.0001$ ; ns, not significant.

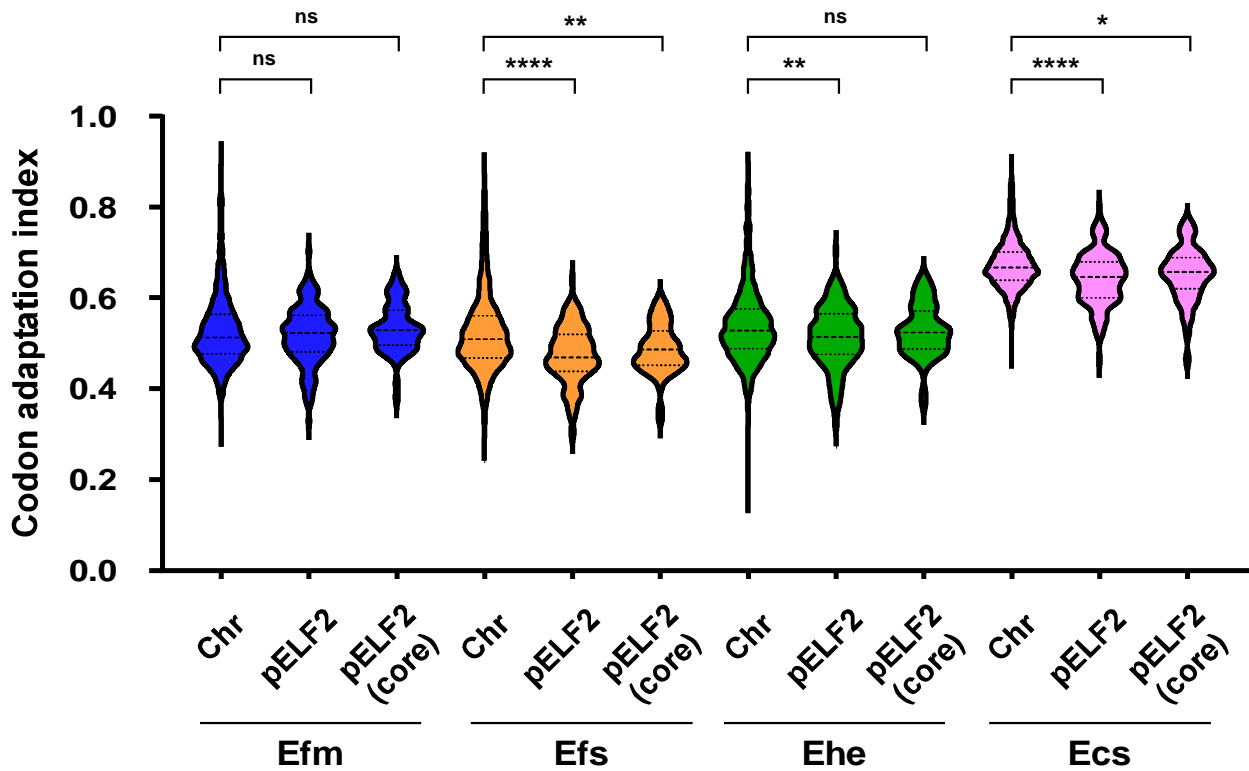

**Supplementary Figure 8. Codon adaptation index analysis.**

For the four enterococci species, the codon adaptation index for the chromosomal genes (Chr), the genes on pELF2, and the core genes on pELF2 were determined and illustrated in violin plots. \*,  $p \leq 0.05$ ; \*\*,  $p \leq 0.01$ ; \*\*\*\*,  $p \leq 0.0001$  (Mann–Whitney test). Efm: *E. faecium* (BM4105RF), Efs: *E. faecalis* (FA2-2), Ehe: *E. hirae* (ATCC9790RF), Ecs: *E. casseliflavus* (KT06RF).

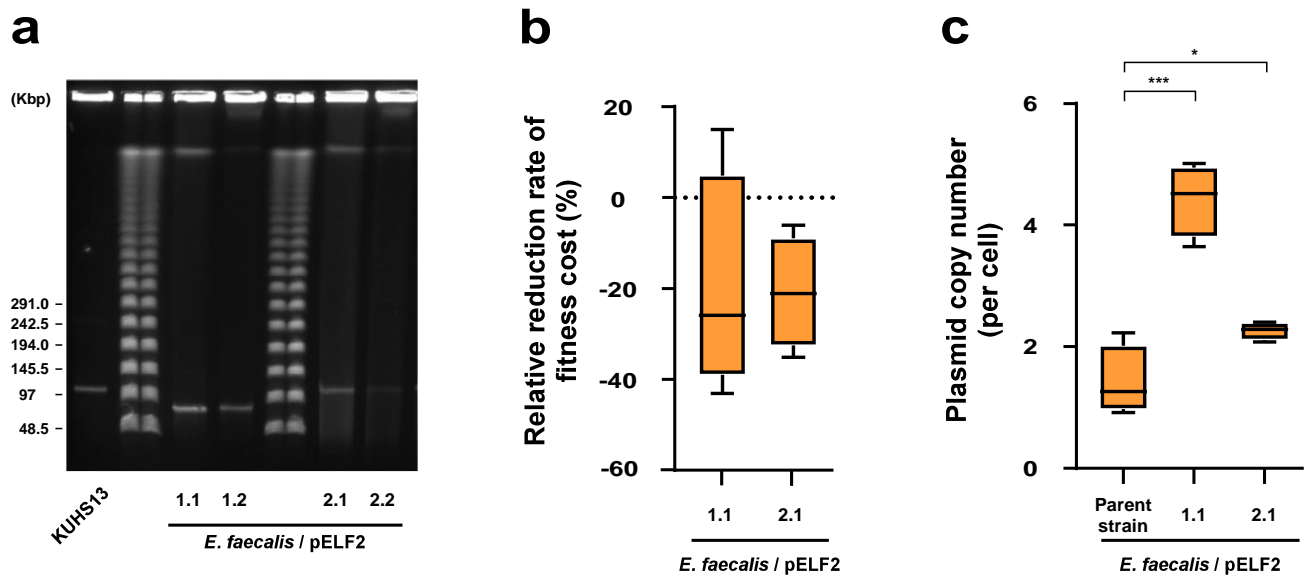

**Supplementary Figure 9. Analysis of structure and stability of the pELF1-like plasmid in *E. faecalis*.**

(a) PFGE analysis was conducted to assess the size of the pELF1-like plasmid (pELF2) harbored by *E. faecalis* (FA2-2) on day 5 of the long-term passage assay (day 5-evolved strains) (Figure 3C). Colonies of day 5-evolved strains were randomly selected and subjected to PFGE (S1 nuclease untreated) along with the wild strain harboring pELF2 (KUHS13; accession number: SAMD00202474). (b) The percentage reduction in fitness cost relative to the parent strain (FA2-2/pELF2) was calculated in quadruplicate. (c) The plasmid copy number was measured using qPCR. Quadruplicate results were shown in the box-and-whisker diagram. \*,  $p \leq 0.05$ , \*\*\*,  $p \leq 0.001$  (unpaired *t*-test;  $p = 0.0004$ , and  $p = 0.0286$ ).

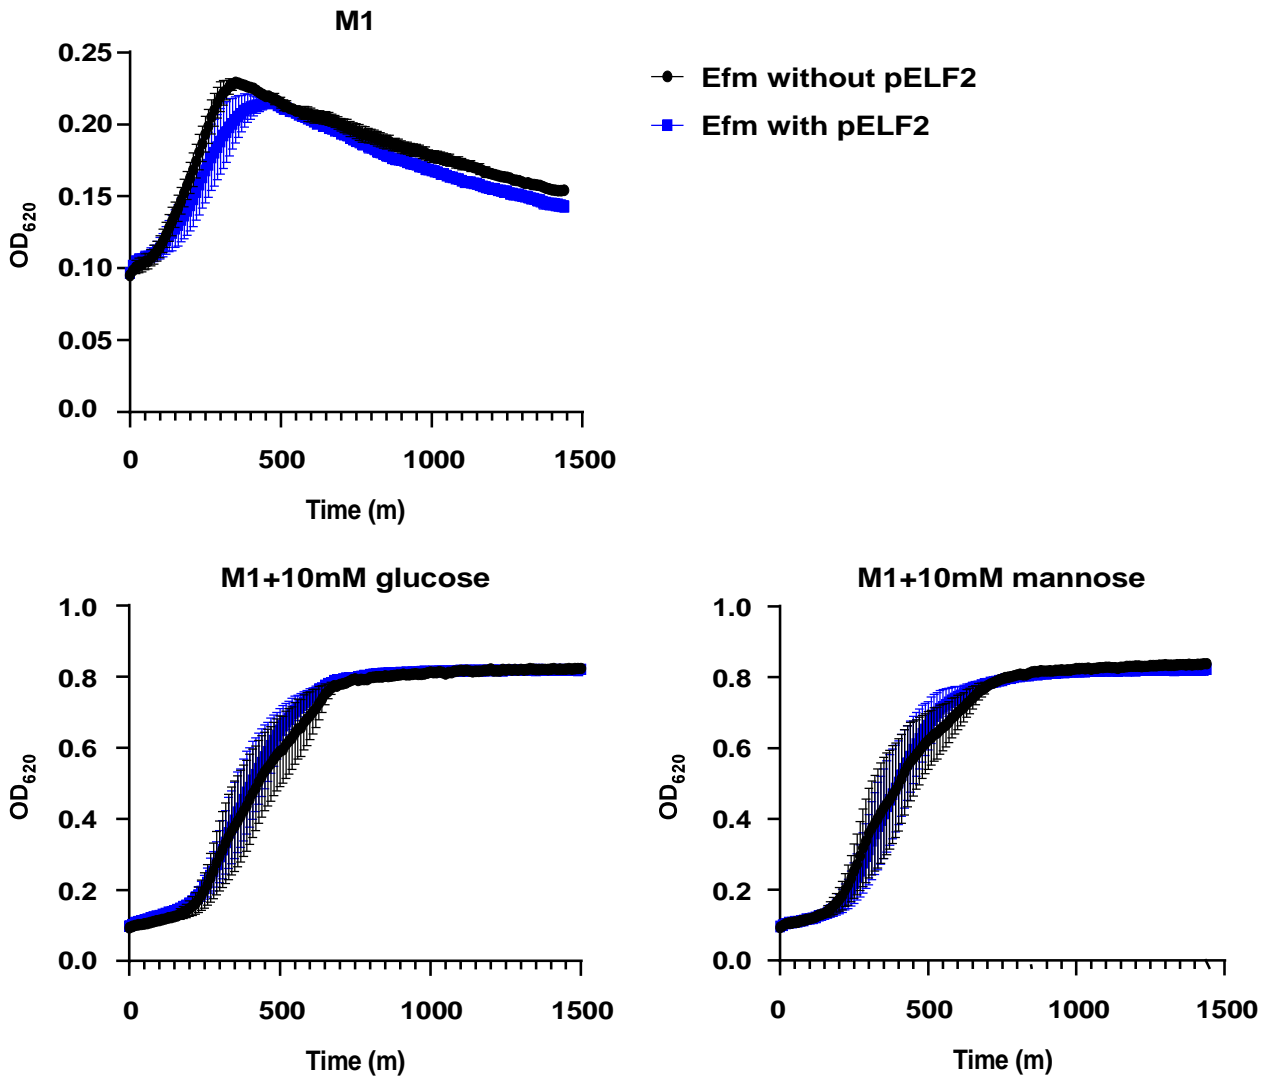

**Supplementary Figure 10. Effect of pELF1-like plasmid carriage on *E. faecium* growth in M1 medium.**

The impact of pELF1-like plasmid (pELF2) on the growth of *E. faecium* (BM4105RF) under carbon source-limited culture conditions was analyzed. Black dots and lines indicate strains without pELF2, and blue dots and lines indicate strains with pELF2. The mean and standard error are plotted in four independent experiments. Individual culture conditions are shown at the top of each graph.

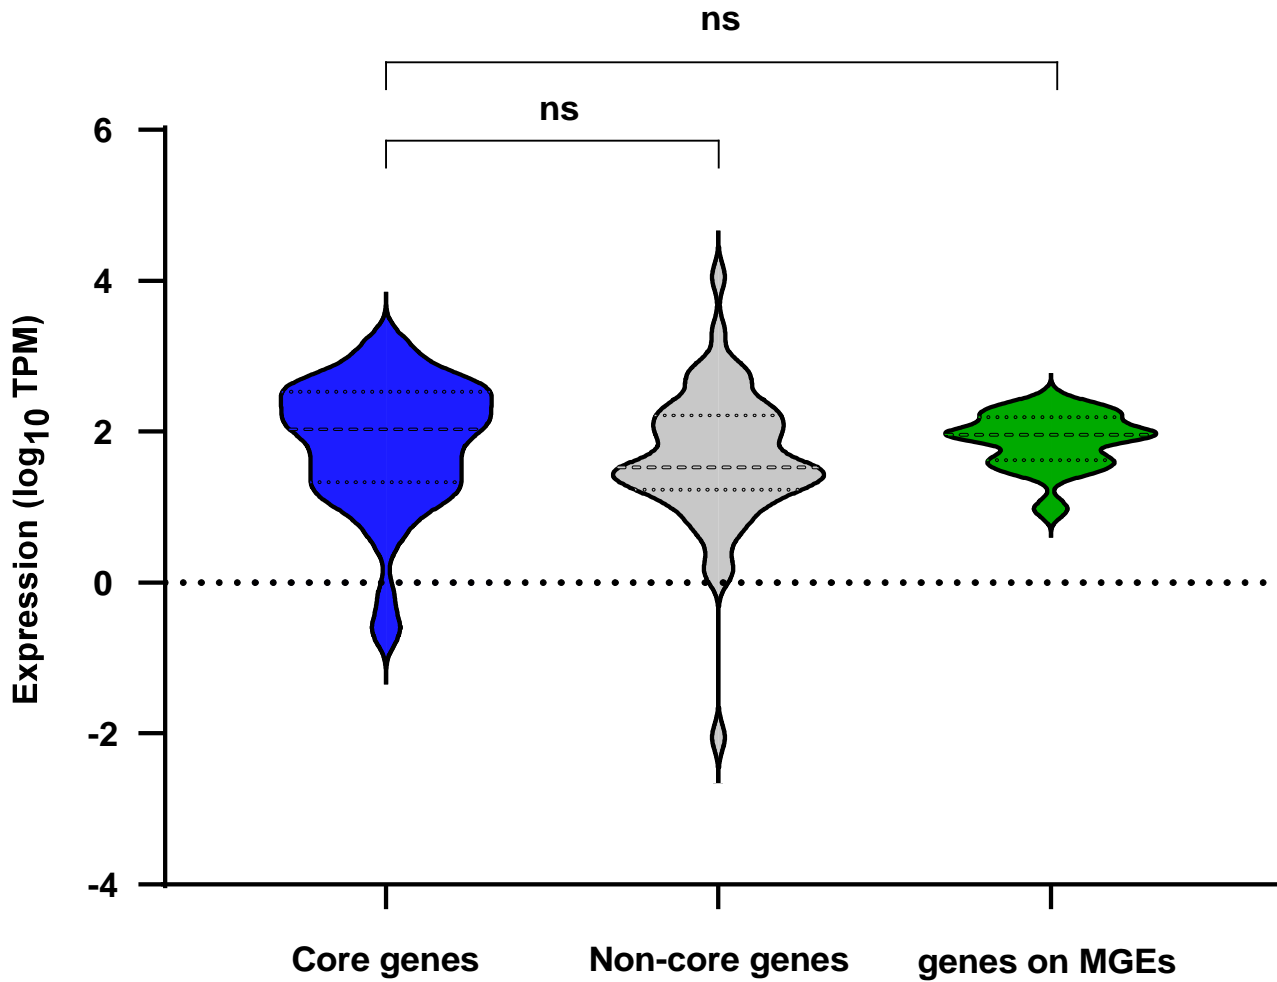

**Supplementary Figure 11. Comparative analysis of transcript levels of genes on the pELF1-like plasmid.**

Transcription levels (TPM) of genes on pELF2 were compared by classification of core genes, non-core genes, and accessory genes (MGE) and illustrated in violin plots. ns, not significant (Mann-Whitney test).

**Supplementary Table 1. Primers used in this study.**

| Primer name       | primer sequences (5' - 3') | Product size (bp) | Description                                                                                                                     | References |
|-------------------|----------------------------|-------------------|---------------------------------------------------------------------------------------------------------------------------------|------------|
| Left_end_F        | CCAACCGCCAGATAAAAATG       | 552               | For detecting the hairpin end of pELF1-like linear plasmids                                                                     | This study |
| Left_end_R        | GATGCGATTGAGAAGAAATAAGAA   |                   |                                                                                                                                 |            |
| Right_end_F       | ATGTCTGACGGATATTGAATAG     | 123               | For detecting the invertron end of pELF1-like linear plasmids                                                                   | This study |
| Right_end_R       | GCAAGCGACTTGCTTAATG        |                   |                                                                                                                                 |            |
| Linear_plasmid_2F | AGTGGCGAAATGGTTATTGG       | 122               | For copy number and transcript level analyses (detecting replication protein gene of linear plasmids)                           | This study |
| Linear_plasmid_2R | AAATTCTTTCGCCTGCTC         |                   |                                                                                                                                 |            |
| Efm_gyrB_F        | GCTTCACITCCTGCTTCACC       | 115               | For copy number and transcript level analyses (detecting <i>gyrB</i> of a <i>E. faecium</i> chromosome (internal control)       | This study |
| Efm_gyrB_R        | GGGCCATCATTGATTACTT        |                   |                                                                                                                                 |            |
| Efs_gyrB_F        | GAGTGTGCGATGATGCCATTG      | 101               | For copy number and transcript level analyses (detecting <i>gyrB</i> of a <i>E. faecalis</i> chromosome (internal control)      | This study |
| Efs_gyrB_R        | CGTAATGGGCATTTCTTCG        |                   |                                                                                                                                 |            |
| Ehe_gyrB_F        | CAACGATGGACCCTAGCAAT       | 107               | For copy number and transcript level analyses (detecting <i>gyrB</i> of a <i>E. hirae</i> chromosome (internal control)         | This study |
| Ehe_gyrB_R        | ACGAGGTTCACCTCGATCAC       |                   |                                                                                                                                 |            |
| Ecs_gyrB_F        | ACGGTTCAACGCTACAAAAGG      | 118               | For copy number and transcript level analyses (detecting <i>gyrB</i> of a <i>E. casseliflavus</i> chromosome (internal control) | This study |
| Ecs_gyrB_R        | CGGCTTCTATGGCATCATCT       |                   |                                                                                                                                 |            |
| RepB_F            | TGATCAAATCTTGAACGGAAC      | 136               | For transcript level analysis (detecting <i>repB</i> of pELF1-like linear plasmids)                                             | This study |
| RepB_R            | ATCCCAATGAATCCGATCAA       |                   |                                                                                                                                 |            |

**Supplementary Table 2. MIC information of the pELF1-like plasmids carrying strains.**

| Strain | Species           | van genotype | Date of Isolation (Year) | Region  | MIC (mg/L) <sup>a</sup> |     |     |       |       |       |       |       |     |     |     |     |       |       |       |  |
|--------|-------------------|--------------|--------------------------|---------|-------------------------|-----|-----|-------|-------|-------|-------|-------|-----|-----|-----|-----|-------|-------|-------|--|
|        |                   |              |                          |         | VAN                     | TEC | LZD | AMP   | GEN   | KAN   | STR   | ERY   | CHL | TET | MIN | CIP | CRO   | CMZ   | MEM   |  |
| JHP9   | <i>E. faecium</i> | vanA         | 2000                     | Chiba   | 1024                    | 256 | 2   | 256   | 512   | >1024 | 2048  | >1024 | 8   | 64  | 32  | 512 | >1024 | >1024 | 512   |  |
| JHP10  | <i>E. faecium</i> | vanA         | 2000                     | Chiba   | 1024                    | 128 | 2   | 512   | 1024  | >1024 | >2048 | >1024 | 3   | 32  | 32  | 512 | >1024 | >1024 | 1024  |  |
| JHP35  | <i>E. faecium</i> | vanA         | 2002                     | Aichi   | 512                     | 16  | 2   | 512   | >1024 | >1024 | 16    | >1024 | 8   | 64  | 32  | 4   | >1024 | >1024 | >1024 |  |
| JHP36  | <i>E. faecium</i> | vanA         | 2002                     | Aichi   | 1024                    | 64  | 2   | 512   | 8     | >1024 | 32    | >1024 | 4   | 64  | 32  | 512 | >1024 | >1024 | 1024  |  |
| JHP38  | <i>E. faecium</i> | vanA         | 2002                     | Aichi   | 1024                    | 64  | 2   | 512   | >1024 | >1024 | 32    | >1024 | 4   | 64  | 32  | 512 | >1024 | >1024 | 1024  |  |
| JHP80  | <i>E. faecium</i> | vanB         | 2001-2002                | Akita   | 32                      | 1   | 2   | 128   | 8     | >1024 | >2048 | >1024 | 4   | 1   | 2   | 32  | >1024 | >1024 | 512   |  |
| AA55   | <i>E. faecium</i> | vanA         | 2010                     | Okinawa | 1024                    | 256 | 3   | >1024 | 3     | >1024 | 16-32 | >1024 | 4   | 1   | 1   | 128 | >1024 | >1024 | >1024 |  |
| AA94   | <i>E. faecium</i> | vanB         | 2011                     | Okayama | 32                      | 1   | 3   | 512   | >1024 | >1024 | 256   | >1024 | 4   | 128 | 32  | 64  | >1024 | >1024 | >1024 |  |
| AA96   | <i>E. faecium</i> | vanB         | 2011                     | Okayama | 32                      | 1   | 3   | 512   | >1024 | >1024 | 128   | >1024 | 8   | 1   | 1   | 64  | >1024 | >1024 | 512   |  |
| AA242  | <i>E. faecium</i> | vanA         | 2013                     | Tokyo   | 512                     | 128 | 3   | 512   | 3     | 128   | 16-32 | >1024 | 3   | 1   | 1   | 64  | >1024 | >1024 | >1024 |  |
| AA290  | <i>E. faecium</i> | vanA         | 2013                     | Chiba   | 512                     | 32  | 3   | >1024 | >1024 | >1024 | 2048  | >1024 | 4   | 1   | 1   | 128 | >1024 | >1024 | >1024 |  |
| AA610  | <i>E. faecium</i> | vanB         | 2017                     | N. A.   | 32                      | 1   | 2   | 512   | 4     | >1024 | 16-32 | >1024 | 4   | 1   | 1   | 32  | >1024 | >1024 | >1024 |  |
| AA818  | <i>E. faecium</i> | vanB         | 2019                     | Saitama | 64                      | 2   | 3   | 128   | 16    | >1024 | 16    | >1024 | 16  | 32  | 16  | 512 | >1024 | >1024 | >1024 |  |
| GK923  | <i>E. faecium</i> | -            | 2014                     | Gunma   | 1                       | 1   | 2   | 512   | 8     | >1024 | 32    | >1024 | 3   | 3   | 1   | 256 | >1024 | >1024 | >1024 |  |
| GK941  | <i>E. faecium</i> | -            | 2015                     | Gunma   | 1                       | 1   | 2   | 512   | 4-8   | >1024 | 32    | >1024 | 3   | 3   | 1   | 256 | >1024 | >1024 | >1024 |  |
| GK961  | <i>E. faecium</i> | -            | 2015                     | Gunma   | 1                       | 1   | 2   | 64    | 3     | 512   | 32    | >1024 | 3   | 2   | 1   | 256 | >1024 | >1024 | >1024 |  |

<sup>a</sup>VAN; vancomycin, TEC; teicoplanin, LZD; linezolid, AMP; ampicillin, GEN; gentamicin, KAN; kanamycin, STR; streptomycin, ERY; erythromycin, CHL; chloramphenicol, TET; tetracycline, MIN; minocycline, CIP; ciprofloxacin, LVX; levofloxacin, CMZ; cefmetazole, CRO; ceftriaxone, MEM; meropenem, BAC; bacitracin

N. A.; not applicable

Supplementary Table 3. List of Enterococcal circular plasmids used for G+C content comparison

| Plasmid description                                                                                | Enterococcus spp.  | Topology | Length (bp) | G+C content (%) | Rep type                     | Accession number |
|----------------------------------------------------------------------------------------------------|--------------------|----------|-------------|-----------------|------------------------------|------------------|
| Enterococcus faecium Aus0085 plasmid p5, complete sequence.                                        | <i>E. faecium</i>  | circular | 31,004      | 34.6            | Inc18                        | CP006623         |
| Enterococcus faecium strain 066 plasmid unnamed2, complete sequence.                               | <i>E. faecium</i>  | circular | 49,420      | 38.32           | Inc18                        | CP013996         |
| Enterococcus faecium strain ATCC 700221 plasmid unnamed2, complete sequence.                       | <i>E. faecium</i>  | circular | 63,692      | 31.46           | Inc18                        | CP014451         |
| Enterococcus faecium strain E745 plasmid p6, complete sequence.                                    | <i>E. faecium</i>  | circular | 65,558      | 32.05           | Inc18                        | CP014535         |
| Enterococcus faecium strain E1 plasmid pE1_29, complete sequence.                                  | <i>E. faecium</i>  | circular | 29,012      | 34.2            | Inc18                        | CP018007         |
| Enterococcus faecium strain HP954 plasmid pHP954-2, complete sequence.                             | <i>E. faecium</i>  | circular | 42,864      | 35.84           | Inc18                        | CP083475         |
| Enterococcus faecium strain SCI762-D plasmid p3, complete sequence.                                | <i>E. faecium</i>  | circular | 62,475      | 32.06           | Inc18                        | CP085897         |
| Enterococcus faecium strain SCI762-D plasmid p3, complete sequence.                                | <i>E. faecium</i>  | circular | 63,475      | 32.06           | Inc18                        | CP085909         |
| Enterococcus faecium strain P47 plasmid pP47-27, complete sequence.                                | <i>E. faecium</i>  | circular | 27,897      | 35.44           | Inc18                        | CP091101         |
| Enterococcus faecium strain P47 plasmid pP47-61, complete sequence.                                | <i>E. faecium</i>  | circular | 61,338      | 34.24           | Inc18                        | CP091102         |
| Enterococcus faecium strain UK040 plasmid pUK040_2, complete sequence.                             | <i>E. faecium</i>  | circular | 44,472      | 35.59           | Inc18                        | CP091579         |
| Enterococcus faecium strain E745 plasmid p2, complete sequence.                                    | <i>E. faecium</i>  | circular | 32,423      | 36.13           | Inc18                        | CP014531         |
| Enterococcus faecium strain UK043 plasmid pUK043_2, complete sequence.                             | <i>E. faecium</i>  | circular | 66,324      | 35.07           | Inc18, Inc18                 | CP0091303        |
| Enterococcus faecium Aus0085 plasmid p5, complete sequence.                                        | <i>E. faecium</i>  | circular | 4,072       | 36.2            | Rep_trans                    | CP006625         |
| Enterococcus faecium Aus0085 plasmid p5, complete sequence.                                        | <i>E. faecium</i>  | circular | 2,189       | 38.9            | Rep_trans                    | CP006626         |
| Enterococcus faecium isolate V1225 plasmid pV1225-7, complete sequence.                            | <i>E. faecium</i>  | circular | 1,979       | 38.81           | Rep_trans                    | CP083919         |
| Enterococcus faecium isolate V1164 plasmid pV1164-9, complete sequence.                            | <i>E. faecium</i>  | circular | 1,979       | 38.81           | Rep_trans                    | CP083920         |
| Enterococcus faecium strain SCI762 plasmid p11, complete sequence.                                 | <i>E. faecium</i>  | circular | 1,979       | 38.91           | Rep_trans                    | CP085905         |
| Enterococcus faecium strain SCI762-D plasmid p11, complete sequence.                               | <i>E. faecium</i>  | circular | 1,979       | 38.91           | Rep_trans                    | CP085917         |
| Enterococcus faecium strain NMVRE-001 plasmid p5, complete sequence.                               | <i>E. faecium</i>  | circular | 1,928       | 38.54           | Rep_trans                    | CP089324         |
| Enterococcus faecium isolate V1225 plasmid pV1225-2, complete sequence.                            | <i>E. faecium</i>  | circular | 48,157      | 34.93           | Rep_trans, Inc18, Inc18      | CP083914         |
| Enterococcus faecium isolate V1164 plasmid pV1164-2, complete sequence.                            | <i>E. faecium</i>  | circular | 52,056      | 34.87           | Rep_trans, Inc18, Inc18      | CP083922         |
| Enterococcus faecium strain 4995-20 plasmid p4995-2, complete sequence.                            | <i>E. faecium</i>  | circular | 42,382      | 34.71           | Rep_trans, Rep3, Inc18       | CP084180         |
| Enterococcus faecium strain 4995-20 plasmid p4995-3, complete sequence.                            | <i>E. faecium</i>  | circular | 39,491      | 35.95           | Rep3, Inc18                  | CP084181         |
| Enterococcus faecium strain VRE001 plasmid unnamed2, complete sequence.                            | <i>E. faecium</i>  | circular | 59,226      | 34.75           | Rep1, Rep3, Inc18, Inc18     | CP018702         |
| Enterococcus faecium strain UW8175 plasmid unnamed2, complete sequence.                            | <i>E. faecium</i>  | circular | 38,512      | 35.13           | Rep1, Rep3, Inc18            | CP018300         |
| Enterococcus faecium AAG20 plasmid pAAG20-3 DNA, complete genome.                                  | <i>E. faecium</i>  | circular | 9,507       | 31.43           | Rep3                         | AP024834         |
| Enterococcus faecium AAG22 plasmid pAAG22-3 DNA, complete genome.                                  | <i>E. faecium</i>  | circular | 9,507       | 31.41           | Rep3                         | AP024840         |
| Enterococcus faecium Aus0085 plasmid p4, complete sequence.                                        | <i>E. faecium</i>  | circular | 9,319       | 30.9            | Rep3                         | CP006624         |
| Enterococcus faecium strain E39 plasmid p5, complete sequence.                                     | <i>E. faecium</i>  | circular | 13,141      | 30.7            | Rep3                         | CP011285         |
| Enterococcus faecium strain UW175 plasmid unnamed3, complete sequence.                             | <i>E. faecium</i>  | circular | 10,859      | 31.74           | Rep3                         | CP011831         |
| Enterococcus faecium strain E745 plasmid p5, complete sequence.                                    | <i>E. faecium</i>  | circular | 9,210       | 30.81           | Rep3                         | CP014532         |
| Enterococcus faecium isolate V1225 plasmid pV1225-3, complete sequence.                            | <i>E. faecium</i>  | circular | 7,669       | 33.59           | Rep3                         | CP083915         |
| Enterococcus faecium isolate V1164 plasmid pV1164-4, complete sequence.                            | <i>E. faecium</i>  | circular | 7,669       | 33.59           | Rep3                         | CP083924         |
| Enterococcus faecium strain 4995-20 plasmid p4995-6, complete sequence.                            | <i>E. faecium</i>  | circular | 11,625      | 32.64           | Rep3                         | CP084184         |
| Enterococcus faecium strain SCI762 plasmid p5, complete sequence.                                  | <i>E. faecium</i>  | circular | 7,838       | 33.48           | Rep3                         | CP085899         |
| Enterococcus faecium strain SCI762 plasmid p7, complete sequence.                                  | <i>E. faecium</i>  | circular | 6,175       | 35.47           | Rep3                         | CP085901         |
| Enterococcus faecium strain SCI762-D plasmid p5, complete sequence.                                | <i>E. faecium</i>  | circular | 7,838       | 33.48           | Rep3                         | CP085911         |
| Enterococcus faecium strain SCI762-D plasmid p7, complete sequence.                                | <i>E. faecium</i>  | circular | 6,175       | 35.47           | Rep3                         | CP085913         |
| Enterococcus faecium strain NMVRE-001 plasmid p4, complete sequence.                               | <i>E. faecium</i>  | circular | 11,963      | 32.68           | Rep3                         | CP089323         |
| Enterococcus faecium strain E1 plasmid pE1_13, complete sequence.                                  | <i>E. faecium</i>  | circular | 13,112      | 35.98           | Rep3                         | CP018008         |
| Enterococcus faecium strain UK040 plasmid pUK040_3, complete sequence.                             | <i>E. faecium</i>  | circular | 21,225      | 31.9            | Rep3                         | CP091580         |
| Enterococcus faecium AAG20 plasmid pAAG20-1 DNA, complete genome.                                  | <i>E. faecium</i>  | circular | 92,522      | 35.26           | RepA_N                       | AP024832         |
| Enterococcus faecium AAG20 plasmid pAAG20-2 DNA, complete genome.                                  | <i>E. faecium</i>  | circular | 71,966      | 36.03           | RepA_N                       | AP024833         |
| Enterococcus faecium AAG22 plasmid pAAG22-1 DNA, complete genome.                                  | <i>E. faecium</i>  | circular | 155,411     | 35.29           | RepA_N                       | AP024838         |
| Enterococcus faecium AAG22 plasmid pAAG22-2 DNA, complete genome.                                  | <i>E. faecium</i>  | circular | 71,967      | 36.03           | RepA_N                       | AP024839         |
| Enterococcus faecium T110 plasmid pT110, complete sequence.                                        | <i>E. faecium</i>  | circular | 44,086      | 35.77           | RepA_N                       | CP006031         |
| Enterococcus faecium Aus0085 plasmid p1, complete sequence.                                        | <i>E. faecium</i>  | circular | 130,716     | 34.9            | RepA_N                       | CP006621         |
| Enterococcus faecium Aus0085 plasmid p2, complete sequence.                                        | <i>E. faecium</i>  | circular | 67,314      | 35.2            | RepA_N                       | CP006622         |
| Enterococcus faecium strain E39 plasmid p1, complete sequence.                                     | <i>E. faecium</i>  | circular | 152,440     | 35.41           | RepA_N                       | CP011282         |
| Enterococcus faecium strain E39 plasmid p4, complete sequence.                                     | <i>E. faecium</i>  | circular | 37,865      | 36.01           | RepA_N                       | CP011284         |
| Enterococcus faecium strain UW8175 plasmid unnamed1, complete sequence.                            | <i>E. faecium</i>  | circular | 229,882     | 35.68           | RepA_N                       | CP011829         |
| Enterococcus faecium strain UW76064-3 TC1 plasmid pWCF-TC1, complete sequence.                     | <i>E. faecium</i>  | circular | 66,496      | 35.73           | RepA_N                       | CP013010         |
| Enterococcus faecium strain ATCC 700221 plasmid unnamed3, complete sequence.                       | <i>E. faecium</i>  | circular | 39,138      | 35.54           | RepA_N                       | CP014452         |
| Enterococcus faecium strain E745 plasmid p1, complete sequence.                                    | <i>E. faecium</i>  | circular | 223,688     | 35.68           | RepA_N                       | CP014530         |
| Enterococcus faecium strain E745 plasmid p4, complete sequence.                                    | <i>E. faecium</i>  | circular | 17,244      | 32.54           | RepA_N                       | CP014533         |
| Enterococcus faecium strain E1 plasmid pE1_20, complete sequence.                                  | <i>E. faecium</i>  | circular | 230,049     | 35.11           | RepA_N                       | CP018006         |
| Enterococcus faecium strain VRE001 plasmid unnamed1, complete sequence.                            | <i>E. faecium</i>  | circular | 78,226      | 35.7            | RepA_N                       | CP018070         |
| Enterococcus faecium strain VRE001 plasmid unnamed2, complete sequence.                            | <i>E. faecium</i>  | circular | 170,854     | 34.92           | RepA_N                       | CP018073         |
| Enterococcus faecium strain H7 plasmid unnamed, complete sequence.                                 | <i>E. faecium</i>  | circular | 124,878     | 32.28           | RepA_N                       | CP083180         |
| Enterococcus faecium strain HP954 plasmid pHP954-1, complete sequence.                             | <i>E. faecium</i>  | circular | 196,609     | 34.98           | RepA_N                       | CP083474         |
| Enterococcus faecium isolate V1225 plasmid pV1225-1, complete sequence.                            | <i>E. faecium</i>  | circular | 213,284     | 35.23           | RepA_N                       | CP083913         |
| Enterococcus faecium isolate V1164 plasmid pV1164-1, complete sequence.                            | <i>E. faecium</i>  | circular | 213,279     | 35.23           | RepA_N                       | CP083921         |
| Enterococcus faecium strain 4995-20 plasmid p4995-1, complete sequence.                            | <i>E. faecium</i>  | circular | 262,637     | 35.8            | RepA_N                       | CP084179         |
| Enterococcus faecium strain SCI762 plasmid p1, complete sequence.                                  | <i>E. faecium</i>  | circular | 224,636     | 35.61           | RepA_N                       | CP085896         |
| Enterococcus faecium strain SCI762 plasmid p4, complete sequence.                                  | <i>E. faecium</i>  | circular | 23,182      | 34.79           | RepA_N                       | CP085898         |
| Enterococcus faecium strain SCI762-D plasmid p1, complete sequence.                                | <i>E. faecium</i>  | circular | 224,638     | 35.61           | RepA_N                       | CP085907         |
| Enterococcus faecium strain SCI762-D plasmid p4, complete sequence.                                | <i>E. faecium</i>  | circular | 23,177      | 34.79           | RepA_N                       | CP085910         |
| Enterococcus faecium strain V13-21-E11-012-001 plasmid pK2IEFM001, complete sequence.              | <i>E. faecium</i>  | circular | 201,226     | 35.29           | RepA_N                       | CP089093         |
| Enterococcus faecium strain NMVRE-001 plasmid p1, complete sequence.                               | <i>E. faecium</i>  | circular | 228,311     | 35.7            | RepA_N                       | CP089320         |
| Enterococcus faecium strain NMVRE-001 plasmid p3, complete sequence.                               | <i>E. faecium</i>  | circular | 40,605      | 35.71           | RepA_N                       | CP089322         |
| Enterococcus faecium strain UK043 plasmid pUK043_1, complete sequence.                             | <i>E. faecium</i>  | circular | 161,029     | 35.16           | RepA_N                       | CP091302         |
| Enterococcus faecium strain UK043 plasmid pUK043_3, complete sequence.                             | <i>E. faecium</i>  | circular | 63,306      | 35.53           | RepA_N                       | CP091304         |
| Enterococcus faecium strain UK040 plasmid pUK040_1, complete sequence.                             | <i>E. faecium</i>  | circular | 231,428     | 35.49           | RepA_N                       | CP091578         |
| Enterococcus faecium Aus0004 plasmid AUS0004_p1, complete sequence.                                | <i>E. faecium</i>  | circular | 56,520      | 35.4            | RepA_N                       | NC_017032        |
| Enterococcus faecium NRRL B-2354 plasmid pNB2354_1, complete sequence.                             | <i>E. faecium</i>  | circular | 214,319     | 36              | RepA_N, Inc18                | CP004064         |
| Enterococcus faecium strain ATCC 700221 plasmid unnamed1, complete sequence.                       | <i>E. faecium</i>  | circular | 189,452     | 35.86           | Inc18                        | CP014450         |
| Enterococcus faecium strain E843GE-1-TC1 plasmid pE843-TC-200, complete sequence.                  | <i>E. faecium</i>  | circular | 200,566     | 35.93           | RepA_N, Inc18, Inc18         | CP081053         |
| Enterococcus faecium strain P47 plasmid pP47_180, complete sequence.                               | <i>E. faecium</i>  | circular | 180,523     | 35.18           | RepA_N, Inc18, Inc18         | CP091103         |
| Enterococcus faecium strain 066 plasmid unnamed1, complete sequence.                               | <i>E. faecium</i>  | circular | 381,524     | 35.61           | RepA_N, RepA_N               | CP013995         |
| Enterococcus faecalis D32 plasmid pFD32A, complete sequence.                                       | <i>E. faecalis</i> | circular | 12,893      | 35.5            | Inc18                        | CP003727         |
| Enterococcus faecalis D32 plasmid pFD32B, complete sequence.                                       | <i>E. faecalis</i> | circular | 62,162      | 35.2            | Inc18                        | CP003728         |
| Enterococcus faecalis ATCC 29212 plasmid 1, complete sequence.                                     | <i>E. faecalis</i> | circular | 66,548      | 32.88           | Inc18                        | CP008815         |
| Enterococcus faecalis strain FFS36 plasmid pFFS36_2, complete sequence.                            | <i>E. faecalis</i> | circular | 35,757      | 34.29           | Inc18                        | CP085293         |
| Enterococcus faecalis strain FFS108 plasmid pFFS108_3, complete sequence.                          | <i>E. faecalis</i> | circular | 69,496      | 33.45           | Inc18                        | CP085297         |
| Enterococcus faecalis strain E512 plasmid pE512, complete sequence.                                | <i>E. faecalis</i> | circular | 48,881      | 35.4            | Inc18                        | CP086559         |
| Enterococcus faecalis strain E512-TC1 plasmid pE512-TC1, complete sequence.                        | <i>E. faecalis</i> | circular | 48,549      | 35.27           | Inc18                        | CP086665         |
| Enterococcus faecalis strain E512-TC2 plasmid pE512-TC2, complete sequence.                        | <i>E. faecalis</i> | circular | 48,589      | 35.27           | Inc18                        | CP086667         |
| Enterococcus faecalis strain Fac74 plasmid pFac74_1, complete sequence.                            | <i>E. faecalis</i> | circular | 93,245      | 34.63           | Inc18                        | CP086893         |
| Enterococcus faecalis strain UK045 plasmid pUK045_1, complete sequence.                            | <i>E. faecalis</i> | circular | 90,994      | 34.46           | Inc18                        | CP091197         |
| Enterococcus faecalis V583 plasmid pV583, complete sequence.                                       | <i>E. faecalis</i> | circular | 17,963      | 33.3            | Inc18                        | NC_004670        |
| Enterococcus faecalis DORA_14 plasmid pEFLP_DORA_14 Q608_EFLP00001, whole genome shotgun sequence. | <i>E. faecalis</i> | circular | 5,143       | 36.8            | Rep3                         | AZL1Y000050      |
| Enterococcus faecalis 62 plasmid pE62A, complete sequence.                                         | <i>E. faecalis</i> | circular | 5,143       | 36.8            | Rep3                         | CP002492         |
| Enterococcus faecalis strain E006:H2-2-TC1 plasmid pE006-TC-121, complete sequence.                | <i>E. faecalis</i> | circular | 121,520     | 33.94           | Rep3                         | CP081506         |
| Enterococcus faecalis strain E006 plasmid pE006-19, complete sequence.                             | <i>E. faecalis</i> | circular | 19,832      | 34.48           | Rep3                         | CP082233         |
| Enterococcus faecalis strain FFS108 plasmid pFFS108_5, complete sequence.                          | <i>E. faecalis</i> | circular | 5,120       | 36.84           | Rep3                         | CP085299         |
| Enterococcus faecalis 62 plasmid pE62B, complete sequence.                                         | <i>E. faecalis</i> | circular | 51,164      | 35              | RepA_N                       | CP002493         |
| Enterococcus faecalis 62 plasmid pE62C, complete sequence.                                         | <i>E. faecalis</i> | circular | 55,303      | 34.7            | RepA_N                       | CP002494         |
| Enterococcus faecalis ATCC 29212 plasmid 2, complete sequence.                                     | <i>E. faecalis</i> | circular | 41,610      | 34.25           | RepA_N                       | CP008814         |
| Enterococcus faecalis strain AR_0780 plasmid pAR_0780, complete sequence.                          | <i>E. faecalis</i> | circular | 65,096      | 35.14           | RepA_N                       | CP063981         |
| Enterococcus faecalis strain FFS36 plasmid pFFS36_1, complete sequence.                            | <i>E. faecalis</i> | circular | 43,405      | 34.6            | RepA_N                       | CP085292         |
| Enterococcus faecalis strain E509 plasmid pE509-2, complete sequence.                              | <i>E. faecalis</i> | circular | 33,086      | 32.93           | RepA_N                       | CP086562         |
| Enterococcus faecalis strain UK045 plasmid pUK045_2, complete sequence.                            | <i>E. faecalis</i> | circular | 41,202      | 33.55           | RepA_N                       | CP091199         |
| Enterococcus faecalis strain UK045 plasmid pUK045_3, complete sequence.                            | <i>E. faecalis</i> | circular | 38,753      | 33.25           | RepA_N                       | CP091200         |
| Enterococcus faecalis strain 152 plasmid p1, complete sequence.                                    | <i>E. faecalis</i> | circular | 68,770      | 34              | RepA_N                       | CP091885         |
| Enterococcus faecalis strain 143-1 plasmid p1, complete sequence.                                  | <i>E. faecalis</i> | circular | 68,770      | 34              | RepA_N                       | CP091887         |
| Enterococcus faecalis strain 142-1 plasmid p1, complete sequence.                                  | <i>E. faecalis</i> | circular | 77,272      | 34              | RepA_N                       | CP091890         |
| Enterococcus faecalis strain 142-1 plasmid p2, complete sequence.                                  | <i>E. faecalis</i> | circular | 59,470      | 34.78           | RepA_N                       | CP091891         |
| Enterococcus faecalis strain 101-1 plasmid p1, complete sequence.                                  | <i>E. faecalis</i> | circular | 68,785      | 34.45           | RepA_N                       | CP091900         |
| Enterococcus faecalis strain 99 plasmid p1, complete sequence.                                     | <i>E. faecalis</i> | circular | 88,965      | 34.28           | RepA_N                       | CP091902         |
| Enterococcus faecalis strain 99 plasmid p2, complete sequence.                                     | <i>E. faecalis</i> | circular | 43,739      | 33.89           | RepA_N                       | CP091903         |
| Enterococcus faecalis strain 2-1 plasmid p1, complete sequence.                                    | <i>E. faecalis</i> | circular | 149,744     | 34.89           | RepA_N                       | CP091907         |
| Enterococcus faecalis V583 plasmid pV583, complete sequence.                                       | <i>E. faecalis</i> | circular | 57,660      | 33.9            | RepA_N                       | NC_004671        |
| Enterococcus faecalis strain FFS108 plasmid pFFS108_1, complete sequence.                          | <i>E. faecalis</i> | circular | 97,455      | 33.83           | RepA_N, Inc18                | CP085295         |
| Enterococcus faecalis strain 43-2 plasmid p1, complete sequence.                                   | <i>E. faecalis</i> | circular | 54,858      | 33.66           | RepA_N, Inc18                | CP091905         |
| Enterococcus faecalis V583 plasmid pV583, complete sequence.                                       | <i>E. faecalis</i> | circular | 66,228      | 34.4            | RepA_N, Inc18, Rep1          | NC_004669        |
| Enterococcus faecalis strain FFS108_2 plasmid pFFS108_2, complete sequence.                        | <i>E. faecalis</i> | circular | 77,870      | 35.4            | RepA_N, Rep_trans            | CP085296         |
| Enterococcus faecalis strain FFS17 plasmid pFFS17_1, complete sequence.                            | <i>E. faecalis</i> | circular | 79,361      | 34.34           | RepA_N, Rep_trans, Rep_trans | CP085290         |
| Enterococcus hirae strain OQF3-9, contig.                                                          | <i>E. hirae</i>    | circular | 33,132      | 35.23           | Inc18                        | CP037957         |
| Enterococcus hirae strain F104, contig.                                                            | <i>E. hirae</i>    | circular | 56,910      | 34.19           | Inc18                        | CP07             |



**Supplementary Table 4. Summary statistics of core plasmid gene analysis of all pELF1-like plasmids by Blastp using Roary.**

|                          | Number of genes by Blastp <sup>a</sup> |     |     |     |     |
|--------------------------|----------------------------------------|-----|-----|-----|-----|
|                          | 90%                                    | 80% | 70% | 60% | 50% |
| Core genes (99%-100%)    | 45                                     | 57  | 58  | 58  | 58  |
| Soft core genes (95-99%) | 10                                     | 13  | 13  | 13  | 13  |
| Shell genes (15%-95%)    | 97                                     | 79  | 76  | 77  | 79  |
| Cloud genes (0-15%)      | 348                                    | 324 | 319 | 314 | 306 |
| Total genes (0-100%)     | 500                                    | 473 | 466 | 462 | 456 |

<sup>a</sup> Core and accessory genes were identified using Roary from thirty two linear pELF1-like plasmids. For identification from all linear plasmids, cut-off value of blastp was 50-90%, and other default settings were used.

Supplementary Table 5. CDS annotation information of pELF2 and TPM value of the pELF2 CDS in transcriptome analysis.

| CDS # | Gene_locus <sup>a</sup> | Start  | End | Strand | gene <sup>b</sup>                                               | Description <sup>a</sup> | Core genes (blastp-80%) | Length (bp) | est_counts | TPM (log10)  |
|-------|-------------------------|--------|-----|--------|-----------------------------------------------------------------|--------------------------|-------------------------|-------------|------------|--------------|
| 1     | 989                     | 1199   | -   | NA     | hypothetical protein                                            |                          |                         | 210         | 6          | 1.099319903  |
| 2     | 1165                    | 1564   | -   | NA     | hypothetical protein                                            | core                     |                         | 399         | 13         | 0.804322674  |
| 3     | 1779                    | 2835   | +   | NA     | hypothetical protein                                            | core                     |                         | 1056        | 228        | 1.38182257   |
| 4     | 2854                    | 3208   | +   | NA     | hypothetical protein                                            | core                     |                         | 354         | 148        | 2.089185989  |
| 5     | 3388                    | 3676   | -   | NA     | hypothetical protein                                            | core                     |                         | 288         | 147        | 2.384115858  |
| 6     | 3688                    | 4507   | -   | NA     | hypothetical protein                                            | core                     |                         | 819         | 468        | 1.887294983  |
| 7     | 4732                    | 4954   | +   | NA     | hypothetical protein                                            | core                     |                         | 222         | 404        | 3.015933778  |
| 8     | 4955                    | 5322   | +   | neg    | ReB ParF family toxin                                           | core                     |                         | 367         | 278        | 2.761410209  |
| 9     | 5388                    | 5910   | +   | NA     | hypothetical protein                                            |                          |                         | 522         | 92         | 1.420872084  |
| 10    | 5937                    | 6618   | +   | NA     | IS6 family transposase IS1216E                                  |                          |                         | 681         | 4973.54    | 1.947947611  |
| 11    | 6844                    | 7420   | +   | him_3  | DNA-invertase hie                                               |                          |                         | 576         | 389        | 1.970486349  |
| 12    | 7641                    | 8814   | -   | NA     | IS256 family transposase IS1542                                 |                          |                         | 1173        | 416        | 1.479936472  |
| 13    | 8965                    | 9661   | +   | varA   | DNA binding response regulator VarA                             |                          |                         | 696         | 255        | 1.634394636  |
| 14    | 9690                    | 10793  | +   | varSA  | Vancomycin resistance isoleucine kinase VarSA                   |                          |                         | 1143        | 606        | 1.055685352  |
| 15    | 11007                   | 11976  | +   | varH   | D-specific alpha-keto acid dehydrogenase                        |                          |                         | 969         | 742        | 1.998863268  |
| 16    | 11968                   | 13000  | +   | varA   | Vancomycin/teicoplanin A-type resistance protein VarA           |                          |                         | 1032        | 811        | 1.900797446  |
| 17    | 13005                   | 13614  | +   | varX   | D-alanyl-D-alanine dipeptidase                                  |                          |                         | 609         | 712        | 2.260958066  |
| 18    | 14032                   | 14944  | +   | varY   | D-alanyl-D-alanine carboxypeptidase                             |                          |                         | 912         | 768        | 1.958481221  |
| 19    | 15300                   | 15975  | +   | NA     | IS6 family transposase IS1216E                                  |                          |                         | 675         | 871.426    | 2.22605702   |
| 20    | 16000                   | 17296  | -   | NA     | ISL3 family transposase ISEfa1                                  |                          |                         | 1296        | 158        | 1.702025917  |
| 21    | 17375                   | 17918  | +   | NA     | hypothetical protein                                            |                          |                         | 543         | 13         | 1.883851966  |
| 22    | 18022                   | 18307  | +   | NA     | hypothetical protein                                            | core                     |                         | 285         | 181        | 2.594290872  |
| 23    | 18322                   | 18559  | +   | NA     | hypothetical protein                                            |                          |                         | 237         | 63         | 2.214839876  |
| 24    | 18880                   | 18835  | +   | NA     | hypothetical protein                                            | core                     |                         | 255         | 90         | 2.330246314  |
| 25    | 18916                   | 19102  | +   | NA     | HicA toxin                                                      | core                     |                         | 186         | 416        | 3.153442888  |
| 26    | 19168                   | 19564  | +   | NA     | HicB like antitoxin                                             | core                     |                         | 396         | 500        | 2.498710885  |
| 27    | 19880                   | 19931  | +   | NA     | hypothetical protein                                            | core                     |                         | 351         | 380        | 2.55587989   |
| 28    | 19952                   | 20327  | +   | NA     | hypothetical protein                                            | core                     |                         | 661         | 375        | 2.704122192  |
| 29    | 20735                   | 21725  | +   | NA     | IS200/IS605 family transposase ISEfa4                           |                          |                         | 990         | 2102.88    | 2.305444883  |
| 30    | 21721                   | 21883  | -   | NA     | hypothetical protein                                            |                          |                         | 162         | 0          | -            |
| 31    | 21967                   | 22306  | -   | NA     | hypothetical protein                                            |                          |                         | 339         | 0.0098827  | -2.05330295  |
| 32    | 22525                   | 22924  | -   | NA     | HicB like antitoxin                                             |                          |                         | 399         | 162        | 1.977515551  |
| 33    | 23114                   | 23882  | -   | NA     | RepB                                                            |                          |                         | 768         | 248        | 1.560431529  |
| 34    | 23916                   | 25077  | -   | NA     | hypothetical protein                                            |                          |                         | 1161        | 308        | 1.702025917  |
| 35    | 25340                   | 25487  | -   | NA     | hypothetical protein                                            |                          |                         | 147         | 0          | 1.303857546  |
| 36    | 26246                   | 27395  | +   | NA     | IS200/IS605 family transposase ISEfa4                           |                          |                         | 1149        | 1188.06    | 1.950597519  |
| 37    | 27411                   | 27816  | -   | NA     | hypothetical protein                                            |                          |                         | 405         | 251.995    | 2.130013559  |
| 38    | 28013                   | 28817  | +   | NA     | replication protein                                             | core                     |                         | 804         | 775        | 2.028335743  |
| 39    | 29400                   | 29856  | +   | NA     | hypothetical protein                                            | core                     |                         | 456         | 945        | 2.902979072  |
| 40    | 29974                   | 31033  | +   | NA     | hypothetical protein                                            | core                     |                         | 1059        | 2703       | 2.379765862  |
| 41    | 31074                   | 33024  | +   | NA     | hypothetical protein                                            | core                     |                         | 1950        | 3999       | 2.21671778   |
| 42    | 33026                   | 36608  | +   | NA     | hypothetical protein                                            | core                     |                         | 3642        | 6352       | 2.169867     |
| 43    | 37067                   | 37406  | +   | NA     | hypothetical protein                                            |                          |                         | 339         | 9771       | 4.043165912  |
| 44    | 37536                   | 37737  | +   | NA     | hypothetical protein                                            |                          |                         | 201         | 276        | 2.842635758  |
| 45    | 37756                   | 39913  | +   | NA     | hypothetical protein                                            |                          |                         | 2157        | 7107       | 2.369234417  |
| 46    | 39924                   | 40158  | +   | NA     | hypothetical protein                                            |                          |                         | 234         | 26         | 1.751010601  |
| 47    | 40147                   | 41014  | +   | NA     | hypothetical protein                                            |                          |                         | 867         | 332        | 1.527099486  |
| 48    | 41028                   | 42999  | +   | NA     | hypothetical protein                                            |                          |                         | 1971        | 773        | 1.462219002  |
| 49    | 43165                   | 44422  | +   | NA     | hypothetical protein                                            |                          |                         | 1258        | 108        | 2.419831806  |
| 50    | 45808                   | 47613  | +   | NA     | hypothetical protein                                            |                          |                         | 408         | 251.995    | 2.130013559  |
| 51    | 43929                   | 45078  | +   | NA     | IS200/IS605 family transposase ISEfa4                           |                          |                         | 1149        | 1188.06    | 1.950597519  |
| 52    | 45284                   | 45620  | +   | NA     | hypothetical protein                                            |                          |                         | 336         | 485        | 2.703803629  |
| 53    | 45876                   | 47460  | -   | NA     | hypothetical protein                                            |                          |                         | 1584        | 324        | 1.217601056  |
| 54    | 47581                   | 48166  | +   | NA     | hypothetical protein                                            | core                     |                         | 585         | 612        | 2.157316212  |
| 55    | 48176                   | 48422  | +   | NA     | hypothetical protein                                            | core                     |                         | 246         | 49         | 2.004394037  |
| 56    | 48427                   | 49150  | +   | NA     | hypothetical protein                                            |                          |                         | 723         | 1758       | 2.413945452  |
| 57    | 49280                   | 49802  | +   | NA     | hypothetical protein                                            |                          |                         | 522         | 49         | 1.229547097  |
| 58    | 49794                   | 50025  | +   | NA     | hypothetical protein                                            |                          |                         | 231         | 1          | 0.785718746  |
| 59    | 50030                   | 50396  | +   | NA     | hypothetical protein                                            | core                     |                         | 366         | 26         | 1.181281356  |
| 60    | 50411                   | 50942  | +   | NA     | hypothetical protein                                            | core                     |                         | 531         | 74         | 1.35932313   |
| 61    | 50934                   | 51054  | +   | NA     | hypothetical protein                                            |                          |                         | 120         | 1          | 0.138653151  |
| 62    | 51103                   | 51472  | +   | NA     | hypothetical protein                                            |                          |                         | 369         | 34         | 1.41016964   |
| 63    | 51662                   | 51923  | +   | NA     | hypothetical protein                                            |                          |                         | 261         | 55         | 1.996571154  |
| 64    | 52540                   | 53341  | +   | NA     | hypothetical protein                                            |                          |                         | 801         | 144        | 1.571978002  |
| 65    | 53377                   | 53560  | +   | NA     | hypothetical protein                                            |                          |                         | 183         | 44         | 2.308748976  |
| 66    | 53749                   | 54037  | +   | NA     | hypothetical protein                                            |                          |                         | 288         | 298        | 2.691594647  |
| 67    | 54494                   | 54824  | +   | NA     | hypothetical protein                                            |                          |                         | 330         | 137        | 2.239299479  |
| 68    | 54876                   | 55290  | +   | NA     | hypothetical protein                                            |                          |                         | 414         | 55         | 1.512725743  |
| 69    | 55369                   | 55708  | +   | NA     | hypothetical protein                                            |                          |                         | 339         | 39         | 1.620972594  |
| 70    | 55722                   | 56040  | +   | NA     | hypothetical protein                                            |                          |                         | 318         | 63         | 1.977391791  |
| 71    | 56042                   | 56186  | +   | NA     | hypothetical protein                                            |                          |                         | 144         | 0          | 0.438710032  |
| 72    | 56182                   | 56275  | +   | NA     | hypothetical protein                                            |                          |                         | 93          | 5          | 1.075570318  |
| 73    | 56389                   | 56866  | -   | NA     | hypothetical protein                                            | core                     |                         | 477         | 1124       | 2.654967854  |
| 74    | 56949                   | 58323  | +   | NA     | hypothetical protein                                            | core                     |                         | 1374        | 238        | 1.231446652  |
| 75    | 58347                   | 58875  | +   | NA     | hypothetical protein                                            | core                     |                         | 528         | 171        | 1.673185465  |
| 76    | 58861                   | 59425  | +   | NA     | hypothetical protein                                            | core                     |                         | 564         | 594        | 2.151918119  |
| 77    | 59847                   | 60585  | +   | NA     | hypothetical protein                                            | core                     |                         | 738         | 2220       | 2.578611484  |
| 78    | 60601                   | 61018  | +   | NA     | hypothetical protein                                            |                          |                         | 408         | 208        | 2.070329762  |
| 79    | 61415                   | 62657  | +   | NA     | hypothetical protein                                            | core                     |                         | 1242        | 10911      | 2.881386654  |
| 80    | 62921                   | 64673  | +   | NA     | hypothetical protein                                            |                          |                         | 1752        | 11784      | 2.700813142  |
| 81    | 64936                   | 65311  | +   | NA     | hypothetical protein                                            |                          |                         | 375         | 3201       | 3.314201246  |
| 82    | 65359                   | 67195  | +   | NA     | hypothetical protein                                            | core                     |                         | 1836        | 8813       | 2.570683596  |
| 83    | 67269                   | 68127  | +   | NA     | hypothetical protein                                            |                          |                         | 858         | 97         | 1.022931869  |
| 84    | 68116                   | 69226  | +   | NA     | hypothetical protein                                            |                          |                         | 1110        | 149        | 1.869629796  |
| 85    | 69564                   | 70365  | +   | NA     | hypothetical protein                                            |                          |                         | 801         | 4224       | 3.62588536   |
| 86    | 70470                   | 71259  | +   | NA     | hypothetical protein                                            |                          |                         | 789         | 96         | 1.05720247   |
| 87    | 71489                   | 72359  | +   | NA     | hypothetical protein                                            |                          |                         | 870         | 224        | 1.449285508  |
| 88    | 72378                   | 72726  | +   | NA     | hypothetical protein                                            |                          |                         | 348         | 36         | 1.521089027  |
| 89    | 72738                   | 74001  | +   | NA     | hypothetical protein                                            |                          |                         | 1263        | 382        | 1.408247599  |
| 90    | 74080                   | 75457  | +   | NA     | CelI division FtsK                                              | core                     |                         | 1377        | 475        | 1.490598802  |
| 91    | 75453                   | 76083  | +   | NA     | hypothetical protein                                            |                          |                         | 630         | 181        | 1.530913791  |
| 92    | 76101                   | 76581  | +   | NA     | hypothetical protein                                            |                          |                         | 480         | 176        | 1.623225188  |
| 93    | 76640                   | 77162  | +   | NA     | hypothetical protein (ParB-like nuclease domain)                | core                     |                         | 522         | 172        | 1.729884918  |
| 94    | 77139                   | 77739  | +   | NA     | hypothetical protein                                            |                          |                         | 600         | 173        | 1.609406032  |
| 95    | 77754                   | 78231  | +   | NA     | hypothetical protein                                            |                          |                         | 477         | 269        | 1.947610273  |
| 96    | 78247                   | 79150  | +   | NA     | hypothetical protein                                            |                          |                         | 903         | 615        | 1.819510375  |
| 97    | 79222                   | 79417  | +   | NA     | hypothetical protein                                            | core                     |                         | 195         | 153        | 2.599475867  |
| 98    | 79521                   | 79950  | +   | NA     | hypothetical protein                                            |                          |                         | 429         | 429        | 2.267649997  |
| 99    | 80184                   | 80772  | +   | NA     | hypothetical protein                                            |                          |                         | 588         | 123        | 1.422330014  |
| 100   | 80771                   | 81671  | +   | NA     | hypothetical protein                                            | core                     |                         | 900         | 121        | 1.682457911  |
| 101   | 81670                   | 82585  | +   | NA     | hypothetical protein                                            | core                     |                         | 915         | 151        | 1.198907147  |
| 102   | 82636                   | 82852  | +   | NA     | hypothetical protein                                            | core                     |                         | 216         | 44         | 2.088055729  |
| 103   | 83041                   | 83296  | +   | NA     | hypothetical protein                                            | core                     |                         | 255         | 685        | 3.137165729  |
| 104   | 83474                   | 84524  | +   | NA     | hypothetical protein                                            | core                     |                         | 1050        | 2068       | 2.265530048  |
| 105   | 84700                   | 84931  | +   | NA     | hypothetical protein                                            | core                     |                         | 231         | 28         | 1.705018238  |
| 106   | 84966                   | 85191  | +   | NA     | hypothetical protein                                            | core                     |                         | 225         | 8          | 1.302565679  |
| 107   | 85310                   | 86282  | +   | NA     | hypothetical protein                                            |                          |                         | 972         | 76         | 0.757864617  |
| 108   | 86291                   | 87086  | +   | NA     | hypothetical protein                                            | core                     |                         | 795         | 75         | 1.034866992  |
| 109   | 87114                   | 88233  | +   | NA     | hypothetical protein                                            | core                     |                         | 1119        | 178        | 1.163879634  |
| 110   | 88265                   | 88586  | +   | NA     | hypothetical protein                                            | core                     |                         | 321         | 26         | 1.665292955  |
| 111   | 88840                   | 89734  | +   | NA     | hypothetical protein                                            |                          |                         | 894         | 216        | 1.39532115   |
| 112   | 89753                   | 91382  | +   | NA     | hypothetical protein                                            |                          |                         | 1629        | 343        | 1.249091912  |
| 113   | 91432                   | 92101  | +   | NA     | hypothetical protein                                            |                          |                         | 669         | 113        | 1.28713839   |
| 114   | 92276                   | 93461  | +   | NA     | hypothetical protein                                            |                          |                         | 1185        | 1039       | 1.985847939  |
| 115   | 94387                   | 95713  | +   | neg    | diab_3 DNA polymerase IV                                        |                          |                         | 1326        | 74         | 0.692813002  |
| 116   | 95705                   | 96053  | +   | NA     | hypothetical protein                                            |                          |                         | 348         | 9          | 0.90883553   |
| 117   | 96049                   | 96232  | +   | NA     | hypothetical protein                                            |                          |                         | 183         | 8          | 1.498169213  |
| 118   | 97474                   | 98116  | +   | NA     | hypothetical protein                                            | core                     |                         | 642         | 0          | -0.159688444 |
| 119   | 98234                   | 99320  | +   | varC_5 | Tyrosine recombinase VarC                                       |                          |                         | 1086        | 1938       | 2.25813063   |
| 120   | 99316                   | 101209 | +   | varC_6 | Tyrosine recombinase VarC                                       |                          |                         | 1893        | 881        | 1.010420967  |
| 121   | 101215                  | 101593 | +   | NA     | hypothetical protein                                            |                          |                         | 378         | 199        | 2.151320809  |
| 122   | 101746                  | 102529 | +   | antI   | Streptomycin 3'-adenyltransferase                               |                          |                         | 783         | 556        | 1.927091011  |
| 123   | 102654                  | 103386 | +   | ermA1  | rRNA adenine N-6-methyltransferase                              |                          |                         | 732         | 1851       | 2.395500306  |
| 124   | 103894                  | 104557 | +   | COQ5_3 | 2-methoxy-6-polypropyl-1,4-benzoquinol methylase, mitochondrial |                          |                         | 663         | 182        | 1.483902285  |
| 125   | 104957                  | 105503 | +   | NA     | hypothetical protein                                            | core                     |                         | 546         | 1          | -0.577469252 |
| 126   | 105503                  | 106070 | +   | NA     | hypothetical protein                                            | core                     |                         | 567         | 0          | -0.659982457 |
| 127   | 106084                  | 106333 | +   | NA     | hypothetical protein                                            | core                     |                         | 249         | 3          | 0.018884524  |
| 128   | 106352                  | 106592 | +   | NA     | hypothetical protein                                            | core                     |                         | 240         | 4          | 0.745533449  |
| 129   | 106608                  | 106848 | +   | NA     | hypothetical protein                                            |                          |                         | 240         | 0          | -            |
| 130   |                         |        |     |        |                                                                 |                          |                         |             |            |              |

**Supplementary Table 6. Analysis of the fitness cost of the pELF1-like plasmid (pELF2, and pELF\_AA242) against *Enterococcus* spp..**

| Species                 | Strain     | Fitness cost (%) <sup>a</sup> |            |                |            |
|-------------------------|------------|-------------------------------|------------|----------------|------------|
|                         |            | pELF2                         |            |                | pELF_AA242 |
|                         |            | 25°C                          | 37°C       | 42°C           | 37°C       |
| <i>E. faecium</i>       | BM4105RF   | 2.4 ± 5.1                     | 4.1 ± 3.7  | 6.4 ± 2.9      | -3.6 ± 5.5 |
| <i>E. faecalis</i>      | FA2-2      | 9.1 ± 3.7                     | 12.8 ± 4.2 | 24.0 ± 4.6     | 27.2 ± 3.5 |
| <i>E. faecalis</i>      | OG1RF      | Not tested                    | 39.7 ± 3.3 | Not tested     | 23.4 ± 3.3 |
| <i>E. hirae</i>         | ATCC9790RF | -0.6 ± 3.8                    | 16.4 ± 2.3 | Not applicable | 25.2 ± 4.2 |
| <i>E. casseliflavus</i> | KT06RF     | 0.6 ± 2.8                     | 3.2 ± 1.5  | -1.9 ± 2.8     | 8.0 ± 5.1  |

<sup>a</sup> Based on the results of nine biological replicate experiments, the mean and standard error of fitness cost are shown.

**Supplementary Table 7. Analysis of the pELF1-like plasmid (pELF2) copy number in the four *Enterococcus* spp..**

| Species                 | Strain     | Plasmid copy number (per cell) |
|-------------------------|------------|--------------------------------|
| <i>E. faecium</i>       | BM4105RF   | 3.2 ± 0.2                      |
| <i>E. faecalis</i>      | FA2-2      | 1.4 ± 0.3                      |
| <i>E. hirae</i>         | ATCC9790RF | 1.8 ± 0.1                      |
| <i>E. casseliflavus</i> | KT06RF     | 2.4 ± 0.2                      |

<sup>a</sup> Based on the results of four biological replicate experiments, the average and standard error of plasmid copy number are shown.

Supplementary Table 8. Up-regulated and down-regulated *E. faecium* chromosomal genes associated with pELF1-like plasmid carriage.

| Gene regulation | Gene          | Gene description                                                  | COG category                                                  | log <sub>2</sub> fold change                                  | Gene identifiers <sup>a</sup> |                |
|-----------------|---------------|-------------------------------------------------------------------|---------------------------------------------------------------|---------------------------------------------------------------|-------------------------------|----------------|
| Upregulated     | infC          | Translation initiation factor IF-3                                | Translation, ribosomal structure and biogenesis               | 1.57                                                          | KEOPGMJD_00259                |                |
|                 | galK_1        | Galactokinase                                                     | Lipid transport and metabolism                                | 1.56                                                          | KEOPGMJD_00255                |                |
|                 | NA            | hypothetical protein                                              | Function unknown                                              | 1.54                                                          | KEOPGMJD_00564                |                |
|                 | guaC          | GMP reductase                                                     | Nucleotide transport and metabolism                           | 1.5                                                           | KEOPGMJD_01546                |                |
|                 | nrpE2         | Ribonucleoside-diphosphate reductase subunit alpha 2              | Nucleotide transport and metabolism                           | 1.5                                                           | KEOPGMJD_02205                |                |
|                 | glmS_1        | Glutamine-fructose-6-phosphate aminotransferase [isomerizing]     | Cell wall/membrane/envelope biogenesis                        | 1.46                                                          | KEOPGMJD_01160                |                |
|                 | nrpF          | Ribonucleoside-diphosphate reductase 2 subunit beta               | Nucleotide transport and metabolism                           | 1.46                                                          | KEOPGMJD_02206                |                |
|                 | NA            | Deoxyguanosine kinase                                             | Nucleotide transport and metabolism                           | 1.41                                                          | KEOPGMJD_00256                |                |
|                 | NA            | hypothetical protein                                              | Cell wall/membrane/envelope biogenesis                        | 1.38                                                          | KEOPGMJD_01507                |                |
|                 | gla           | Glycerol facilitator-aquaporin gla                                | Intracellular trafficking, secretion, and vesicular transport | 1.33                                                          | KEOPGMJD_00150                |                |
|                 | mltF_1        | Membrane-bound lytic murein transglycosylase F                    | Inorganic ion transport and metabolism                        | 1.33                                                          | KEOPGMJD_00189                |                |
|                 | topA          | DNA topoisomerase 1                                               | Replication, recombination and repair                         | 1.31                                                          | KEOPGMJD_01625                |                |
|                 | NA            | hypothetical protein                                              | Cell wall/membrane/envelope biogenesis                        | 1.29                                                          | KEOPGMJD_01595                |                |
|                 | pbuO          | Guanine/hypoxanthine permease PbuO                                | Function unknown                                              | 1.27                                                          | KEOPGMJD_01791                |                |
|                 | csaA          | ATP-dependent RNA helicase CsaA                                   | Nucleotide transport and metabolism                           | 1.25                                                          | KEOPGMJD_00217                |                |
|                 | gshAB         | Glutathione biosynthesis bifunctional protein GshAB               | Nucleotide transport and metabolism                           | 1.25                                                          | KEOPGMJD_00127                |                |
|                 | rpsJ          | 30S ribosomal protein S10                                         | Translation, ribosomal structure and biogenesis               | 1.24                                                          | KEOPGMJD_00075                |                |
|                 | defI          | Peptide deformylase 1                                             | Translation, ribosomal structure and biogenesis               | 1.22                                                          | KEOPGMJD_02420                |                |
|                 | NA            | hypothetical protein                                              | -                                                             | 1.17                                                          | KEOPGMJD_00373                |                |
|                 | pheS          | Phenylalanine-tRNA ligase alpha subunit                           | Translation, ribosomal structure and biogenesis               | 1.17                                                          | KEOPGMJD_01488                |                |
|                 | NA            | Putative two-component membrane permease complex subunit SMU_747c | Function unknown                                              | 1.16                                                          | KEOPGMJD_00719                |                |
|                 | nupC          | Nucleoside permease NupC                                          | Nucleotide transport and metabolism                           | 1.13                                                          | KEOPGMJD_01342                |                |
|                 | mntB          | Manganese transport system membrane protein MntB                  | Inorganic ion transport and metabolism                        | 1.13                                                          | KEOPGMJD_00491                |                |
|                 | pbpX_1        | Putative penicillin-binding protein PbpX                          | Defense mechanisms                                            | 1.12                                                          | KEOPGMJD_01864                |                |
|                 | mvaS          | Hydroxymethylglutaryl-CoA synthase                                | Lipid transport and metabolism                                | 1.11                                                          | KEOPGMJD_01686                |                |
|                 | NA            | hypothetical protein                                              | Function unknown                                              | 1.06                                                          | KEOPGMJD_01216                |                |
|                 | dus           | putative tRNA-dihydrouridine synthase                             | Translation, ribosomal structure and biogenesis               | 1.06                                                          | KEOPGMJD_02502                |                |
|                 | NA            | hypothetical protein                                              | Amino acid transport and metabolism                           | 1.05                                                          | KEOPGMJD_01215                |                |
|                 | NA            | hypothetical protein                                              | Function unknown                                              | 1.04                                                          | KEOPGMJD_01784                |                |
|                 | NA            | Glycine/sarcosine N-methyltransferase                             | Secondary metabolites biosynthesis, transport and catabolism  | 1.04                                                          | KEOPGMJD_01802                |                |
|                 | NA            | hypothetical protein                                              | Posttranslational modification, protein turnover, chaperones  | 1.03                                                          | KEOPGMJD_01970                |                |
|                 | NA            | hypothetical protein                                              | -                                                             | 1.03                                                          | KEOPGMJD_01209                |                |
|                 | betI_1        | HTH-type transcriptional regulator BetI                           | Transcription                                                 | 1.03                                                          | KEOPGMJD_00390                |                |
|                 | NA            | hypothetical protein                                              | Function unknown                                              | 1.02                                                          | KEOPGMJD_01891                |                |
|                 | nusG          | Transcription termination/antitermination protein NusG            | Transcription                                                 | 1.01                                                          | KEOPGMJD_02237                |                |
|                 | glnA          | Glutamine synthetase                                              | Amino acid transport and metabolism                           | 1.01                                                          | KEOPGMJD_02001                |                |
|                 | scaC          | Manganese import ATP-binding protein ScaC                         | Inorganic ion transport and metabolism                        | 1.01                                                          | KEOPGMJD_00490                |                |
|                 | prfC          | Peptide chain release factor 3                                    | Translation, ribosomal structure and biogenesis               | 1                                                             | KEOPGMJD_01830                |                |
|                 | Downregulated | ptcB_1                                                            | PTS system galactose-specific EIIB component                  | Carbohydrate transport and metabolism                         | -1.44                         | KEOPGMJD_00313 |
|                 |               | licA_1                                                            | Lichenan-specific phosphotransferase enzyme IIA component     | Carbohydrate transport and metabolism                         | -1.39                         | KEOPGMJD_00314 |
|                 |               | licC_1                                                            | Lichenan permease IIC component                               | Intracellular trafficking, secretion, and vesicular transport | -1.36                         | KEOPGMJD_00315 |
|                 |               | manX_3                                                            | PTS system mannose-specific EIIB component                    | Carbohydrate transport and metabolism                         | -1.2                          | KEOPGMJD_01946 |
|                 |               | NA                                                                | hypothetical protein                                          | Cell wall/membrane/envelope biogenesis                        | -1.18                         | KEOPGMJD_01372 |
| NA              |               | hypothetical protein                                              | -                                                             | -1.11                                                         | KEOPGMJD_00451                |                |
| gadC_1          |               | putative glutamate/gamma-aminobutyrate antiporter                 | Amino acid transport and metabolism                           | -1.11                                                         | KEOPGMJD_00394                |                |
| NA              |               | hypothetical protein                                              | -                                                             | -1.1                                                          | KEOPGMJD_00911                |                |
| manZ_5          |               | PTS system mannose-specific EIID component                        | Carbohydrate transport and metabolism                         | -1.1                                                          | KEOPGMJD_02208                |                |
| agrB_2          |               | Accessory gene regulator protein B                                | KOT                                                           | -1.07                                                         | KEOPGMJD_00452                |                |
| NA              |               | hypothetical protein                                              | -                                                             | -1.06                                                         | KEOPGMJD_00120                |                |
| NA              |               | hypothetical protein                                              | Signal transduction mechanisms                                | -1.06                                                         | KEOPGMJD_00450                |                |
| NA              |               | hypothetical protein                                              | Function unknown                                              | -1.04                                                         | KEOPGMJD_00580                |                |
| dcuS_1          |               | Sensor histidine kinase DcuS                                      | Signal transduction mechanisms                                | -1.01                                                         | KEOPGMJD_01583                |                |
| manX_2          |               | PTS system mannose-specific EIIB component                        | Carbohydrate transport and metabolism                         | -1.01                                                         | KEOPGMJD_01945                |                |
| mall_1          |               | Oligo-1,6-glucosidase                                             | Carbohydrate transport and metabolism                         | -1.01                                                         | KEOPGMJD_00357                |                |
| manZ_2          |               | PTS system mannose-specific EIID component                        | Carbohydrate transport and metabolism                         | -1.01                                                         | KEOPGMJD_01723                |                |
| manZ_3          |               | PTS system mannose-specific EIID component                        | Carbohydrate transport and metabolism                         | -1                                                            | KEOPGMJD_01943                |                |

Adjusted *p*-value < 0.05 was used to interpret the results.

<sup>a</sup> For RNA-seq, genome annotation was done using prokka.

NA; not applicable

High-mass Stars & Star Clusters in the Galaxy

| Star Name | Distance (kpc) | Mass (M <sub>☉</sub> )        | Age (Myr) | Notes                   |
|-----------|----------------|-------------------------------|-----------|-------------------------|
| R136a1    | 136            | 160                           | 0.1       | Most massive star known |
| R136a2    | 136            | 150                           | 0.1       |                         |
| R136a3    | 136            | 140                           | 0.1       |                         |
| R136a4    | 136            | 130                           | 0.1       |                         |
| R136a5    | 136            | 120                           | 0.1       |                         |
| R136a6    | 136            | 110                           | 0.1       |                         |
| R136a7    | 136            | 100                           | 0.1       |                         |
| R136a8    | 136            | 90                            | 0.1       |                         |
| R136a9    | 136            | 80                            | 0.1       |                         |
| R136a10   | 136            | 70                            | 0.1       |                         |
| R136a11   | 136            | 60                            | 0.1       |                         |
| R136a12   | 136            | 50                            | 0.1       |                         |
| R136a13   | 136            | 40                            | 0.1       |                         |
| R136a14   | 136            | 30                            | 0.1       |                         |
| R136a15   | 136            | 20                            | 0.1       |                         |
| R136a16   | 136            | 10                            | 0.1       |                         |
| R136a17   | 136            | 5                             | 0.1       |                         |
| R136a18   | 136            | 3                             | 0.1       |                         |
| R136a19   | 136            | 2                             | 0.1       |                         |
| R136a20   | 136            | 1                             | 0.1       |                         |
| R136a21   | 136            | 0.5                           | 0.1       |                         |
| R136a22   | 136            | 0.2                           | 0.1       |                         |
| R136a23   | 136            | 0.1                           | 0.1       |                         |
| R136a24   | 136            | 0.05                          | 0.1       |                         |
| R136a25   | 136            | 0.02                          | 0.1       |                         |
| R136a26   | 136            | 0.01                          | 0.1       |                         |
| R136a27   | 136            | 0.005                         | 0.1       |                         |
| R136a28   | 136            | 0.002                         | 0.1       |                         |
| R136a29   | 136            | 0.001                         | 0.1       |                         |
| R136a30   | 136            | 0.0005                        | 0.1       |                         |
| R136a31   | 136            | 0.0002                        | 0.1       |                         |
| R136a32   | 136            | 0.0001                        | 0.1       |                         |
| R136a33   | 136            | 0.00005                       | 0.1       |                         |
| R136a34   | 136            | 0.00002                       | 0.1       |                         |
| R136a35   | 136            | 0.00001                       | 0.1       |                         |
| R136a36   | 136            | 0.000005                      | 0.1       |                         |
| R136a37   | 136            | 0.000002                      | 0.1       |                         |
| R136a38   | 136            | 0.000001                      | 0.1       |                         |
| R136a39   | 136            | 0.0000005                     | 0.1       |                         |
| R136a40   | 136            | 0.0000002                     | 0.1       |                         |
| R136a41   | 136            | 0.0000001                     | 0.1       |                         |
| R136a42   | 136            | 0.00000005                    | 0.1       |                         |
| R136a43   | 136            | 0.00000002                    | 0.1       |                         |
| R136a44   | 136            | 0.00000001                    | 0.1       |                         |
| R136a45   | 136            | 0.000000005                   | 0.1       |                         |
| R136a46   | 136            | 0.000000002                   | 0.1       |                         |
| R136a47   | 136            | 0.000000001                   | 0.1       |                         |
| R136a48   | 136            | 0.0000000005                  | 0.1       |                         |
| R136a49   | 136            | 0.0000000002                  | 0.1       |                         |
| R136a50   | 136            | 0.0000000001                  | 0.1       |                         |
| R136a51   | 136            | 0.00000000005                 | 0.1       |                         |
| R136a52   | 136            | 0.00000000002                 | 0.1       |                         |
| R136a53   | 136            | 0.00000000001                 | 0.1       |                         |
| R136a54   | 136            | 0.000000000005                | 0.1       |                         |
| R136a55   | 136            | 0.000000000002                | 0.1       |                         |
| R136a56   | 136            | 0.000000000001                | 0.1       |                         |
| R136a57   | 136            | 0.0000000000005               | 0.1       |                         |
| R136a58   | 136            | 0.0000000000002               | 0.1       |                         |
| R136a59   | 136            | 0.0000000000001               | 0.1       |                         |
| R136a60   | 136            | 0.00000000000005              | 0.1       |                         |
| R136a61   | 136            | 0.00000000000002              | 0.1       |                         |
| R136a62   | 136            | 0.00000000000001              | 0.1       |                         |
| R136a63   | 136            | 0.000000000000005             | 0.1       |                         |
| R136a64   | 136            | 0.000000000000002             | 0.1       |                         |
| R136a65   | 136            | 0.000000000000001             | 0.1       |                         |
| R136a66   | 136            | 0.0000000000000005            | 0.1       |                         |
| R136a67   | 136            | 0.0000000000000002            | 0.1       |                         |
| R136a68   | 136            | 0.0000000000000001            | 0.1       |                         |
| R136a69   | 136            | 0.00000000000000005           | 0.1       |                         |
| R136a70   | 136            | 0.00000000000000002           | 0.1       |                         |
| R136a71   | 136            | 0.00000000000000001           | 0.1       |                         |
| R136a72   | 136            | 0.000000000000000005          | 0.1       |                         |
| R136a73   | 136            | 0.000000000000000002          | 0.1       |                         |
| R136a74   | 136            | 0.000000000000000001          | 0.1       |                         |
| R136a75   | 136            | 0.0000000000000000005         | 0.1       |                         |
| R136a76   | 136            | 0.0000000000000000002         | 0.1       |                         |
| R136a77   | 136            | 0.0000000000000000001         | 0.1       |                         |
| R136a78   | 136            | 0.00000000000000000005        | 0.1       |                         |
| R136a79   | 136            | 0.00000000000000000002        | 0.1       |                         |
| R136a80   | 136            | 0.00000000000000000001        | 0.1       |                         |
| R136a81   | 136            | 0.000000000000000000005       | 0.1       |                         |
| R136a82   | 136            | 0.000000000000000000002       | 0.1       |                         |
| R136a83   | 136            | 0.000000000000000000001       | 0.1       |                         |
| R136a84   | 136            | 0.0000000000000000000005      | 0.1       |                         |
| R136a85   | 136            | 0.0000000000000000000002      | 0.1       |                         |
| R136a86   | 136            | 0.0000000000000000000001      | 0.1       |                         |
| R136a87   | 136            | 0.00000000000000000000005     | 0.1       |                         |
| R136a88   | 136            | 0.00000000000000000000002     | 0.1       |                         |
| R136a89   | 136            | 0.00000000000000000000001     | 0.1       |                         |
| R136a90   | 136            | 0.000000000000000000000005    | 0.1       |                         |
| R136a91   | 136            | 0.000000000000000000000002    | 0.1       |                         |
| R136a92   | 136            | 0.000000000000000000000001    | 0.1       |                         |
| R136a93   | 136            | 0.0000000000000000000000005   | 0.1       |                         |
| R136a94   | 136            | 0.0000000000000000000000002   | 0.1       |                         |
| R136a95   | 136            | 0.0000000000000000000000001   | 0.1       |                         |
| R136a96   | 136            | 0.00000000000000000000000005  | 0.1       |                         |
| R136a97   | 136            | 0.00000000000000000000000002  | 0.1       |                         |
| R136a98   | 136            | 0.00000000000000000000000001  | 0.1       |                         |
| R136a99   | 136            | 0.000000000000000000000000005 | 0.1       |                         |
| R136a100  | 136            | 0.000000000000000000000000002 | 0.1       |                         |

**Supplementary Table 10. Detail information of MGEs of pELF1-like plasmid carrying strains.**

| Strain | Species           | van genotype              | Date of Isolation | Size of a pELF1-like linear plasmid (bp) | Number of MGEs <sup>d</sup> |            |                | Resistance genes on the pELF1-like plasmid                                        |
|--------|-------------------|---------------------------|-------------------|------------------------------------------|-----------------------------|------------|----------------|-----------------------------------------------------------------------------------|
|        |                   |                           |                   |                                          | Genome                      | Chromosome | Linear plasmid |                                                                                   |
| JHP9   | <i>E. faecium</i> | <i>vanA</i>               | 2000              | 82,303                                   | 63                          | 40         | 0              | -                                                                                 |
| JHP10  | <i>E. faecium</i> | <i>vanA</i>               | 2000              | 82,303                                   | 58                          | 33         | 0              | -                                                                                 |
| JHP35  | <i>E. faecium</i> | <i>vanA</i>               | 2002              | 110,099                                  | 42                          | 25         | 3              | <i>tet(M)</i> , <i>erm(B)</i>                                                     |
| JHP36  | <i>E. faecium</i> | <i>vanA</i>               | 2002              | 88,997                                   | 42                          | 26         | 0              | -                                                                                 |
| JHP38  | <i>E. faecium</i> | <i>vanA</i>               | 2002              | 88,998                                   | 38                          | 29         | 0              | -                                                                                 |
| JHP80  | <i>E. faecium</i> | <i>vanB</i>               | 2001-2002         | 88,683                                   | 55                          | 55         | 0              | -                                                                                 |
| AA55   | <i>E. faecium</i> | <i>vanA</i>               | 2010              | 87,193                                   | 41                          | 30         | 0              | -                                                                                 |
| AA94   | <i>E. faecium</i> | <i>vanB</i>               | 2011              | 88,777                                   | 70                          | 55         | 0              | -                                                                                 |
| AA96   | <i>E. faecium</i> | <i>vanB</i>               | 2011              | 87,216                                   | 30                          | 19         | 0              | -                                                                                 |
| AA242  | <i>E. faecium</i> | <i>vanA</i>               | 2013              | 132,791                                  | 40                          | 23         | 4              | <i>vanA</i> , <i>ant(9)-Ia</i> , <i>erm(A)</i>                                    |
| AA290  | <i>E. faecium</i> | <i>vanA</i>               | 2013              | 89,119                                   | 55                          | 37         | 1              | -                                                                                 |
| AA708  | <i>E. faecium</i> | <i>vanA</i> , <i>vanM</i> | 2014              | 143,316                                  | 100                         | 70         | 14             | <i>vanA</i> , <i>vanM</i> , <i>ant(6)-Ia</i> , <i>aph(3')-III</i> , <i>erm(B)</i> |
| AA610  | <i>E. faecium</i> | <i>vanB</i>               | 2017              | 89,199                                   | 54                          | 30         | 8              | -                                                                                 |
| KUHS13 | <i>E. faecium</i> | <i>vanA</i>               | 2017              | 108,102                                  | 86                          | 61         | 8              | <i>vanA</i> , <i>ant(9)-Ia</i> , <i>erm(A)</i>                                    |
| AA818  | <i>E. faecium</i> | <i>vanB</i>               | 2019              | 86,780                                   | 54                          | 44         | 0              | -                                                                                 |
| GK923  | <i>E. faecium</i> | -                         | 2014              | 76,985                                   | 41                          | 30         | 0              | -                                                                                 |
| GK941  | <i>E. faecium</i> | -                         | 2015              | 76,985                                   | 42                          | 31         | 0              | -                                                                                 |
| GK961  | <i>E. faecium</i> | -                         | 2015              | 76,985                                   | 40                          | 30         | 0              | -                                                                                 |

<sup>d</sup> MGEs were examined using MobileElementsFinder (Software version v1.0.3, and Database version v1.0.2).
